1 Improving retinal vascular endothelial cell tropism through  
2 rational rAAV capsid design

3

4 **Ramesh Periasamy<sup>1¶</sup>, Dwani D. Patel<sup>1¶,2</sup>, Sanford L. Boye<sup>3&</sup>, Shannon E. Boye<sup>4&</sup> &**  
5 **Daniel M. Lipinski<sup>1\*&,2</sup>**

6 <sup>1</sup> Department of Ophthalmology and Visual Science, Medical College of Wisconsin,  
7 Milwaukee, Wisconsin, United States

8 <sup>2</sup> Cell Biology, Neurobiology, Anatomy, Medical College of Wisconsin, Milwaukee,  
9 Wisconsin, United States

10 <sup>3</sup> Powell Gene Therapy Center, Department of Pediatrics, University of Florida,  
11 Gainesville, FL, United States

12 <sup>4</sup> Division of Cellular and Molecular Biology, Department of Pediatrics, University of  
13 Florida, Gainesville, FL, United States

14 <sup>#a</sup>Current Address: Department of Ophthalmology and Visual Science, Medical College of  
15 Wisconsin, Milwaukee, Wisconsin, United States

16

17

18 \* Corresponding author

19 E-mail: [dlipinski@mcw.edu](mailto:dlipinski@mcw.edu)

20

21

22 <sup>¶</sup> These authors contributed equally to this work.

23

24 <sup>&</sup> These authors also contributed equally to this work.

25

26

27

28

## 29 **Abstract**

30

31 Vascular endothelial cells (VEC) are essential for retinal homeostasis and their dysfunction  
32 underlies pathogenesis in diabetic retinopathy (DR) and exudative age-related macular  
33 degeneration (AMD). Studies have shown that recombinant adeno-associated virus (rAAV)  
34 vectors are effective at delivering new genetic material to neural and glial cells within the retina,  
35 but targeting VECs remains challenging. To overcome this limitation, herein we developed rAAV  
36 capsid mutant vectors with improved tropism towards retinal VEC. rAAV2/2, 2/2[QuadYF-TV], and  
37 rAAV2/9 serotype vectors (n=9, capsid mutants per serotype) expressing GFP were generated by  
38 inserting heptameric peptides (7AA) designed to increase endothelial targeting at positions 588  
39 (2/2 and 2/2[QuadYF-TV] or 589 (2/9) of the virus protein (VP 1-3). The packaging and  
40 transduction efficiency of the vectors were assessed in HEK293T and bovine VECs using  
41 Fluorescence microscopy and flow cytometry, leading to the identification of one mutant, termed  
42 EC5, that showed improved endothelial tropism when inserted into all three capsid serotypes.  
43 Intra-ocular and intravenous administration of EC5 mutants in C57Bl/6j mice demonstrated  
44 moderately improved transduction of the retinal vasculature, particularly surrounding the optic  
45 nerve head, and evidence of sinusoidal endothelial cell transduction in the liver. Most notably,  
46 intravenous administration of the rAAV2/2[QuadYF-TV] EC5 mutant led to a dramatic and  
47 unexpected increase in cardiac muscle transduction.

48

## 49 **Introduction**

50 Diabetic retinopathy (**DR**) and age-related macular degeneration (**AMD**) are leading causes of  
51 blindness worldwide and are characterized by the dysfunction of retinal microvascular endothelial  
52 cells (**MVECs**), a critical cell type that controls vascular permeability, promotes new vessel growth,

53 regulates vascular tone, maintains the blood-retinal-barrier (**BRB**), and enables leukocyte  
54 extravasation[1-3]. Dysfunction of MVECs in the advanced stages of DR or AMD consequently  
55 leads to unregulated neovascularization and increased vascular permeability, causing  
56 hemorrhaging and inflammation that contribute towards rapid onset and severe visual  
57 impairment[4]. Current treatment options – photocoagulation of neovascular vessels and  
58 administration of anti-angiogenic agents –focus predominantly on slowing the growth of  
59 neovascular vessels in order to prevent hemorrhaging and vision loss. While these treatments are  
60 highly effective at slowing disease progression, they are destructive (e.g. photocoagulation) or  
61 have a high economic and social burden (e.g. anti-angiogenics), necessitating frequent invasive  
62 interventions throughout the patient’s life that are associated with increased risk of  
63 complications[5]. As such, the ability to modify MVECs via gene therapy in order to ameliorate  
64 dysfunction represents an alternative therapeutic option that could prevent the onset of sight-  
65 threatening complications if intervention is provided at an early stage. While numerous research  
66 groups have focused on identifying molecular targets for effective therapeutics in AMD and DR,  
67 the inability to efficiently mediate gene transfer to the affected MVECs has severely limited  
68 progress towards the development of a long-lasting gene therapy[6, 7].

69 Recombinant adeno-associated virus (**rAAV**) vectors have proven to be safe and effective tools  
70 for mediating gene transfer for the correction of inherited and acquired disorders in multiple  
71 organ systems, including the eye, liver and brain, in both pre-clinical animal models and human  
72 patients [8-12]. While multiple, naturally occurring serotypes exist that exhibit broad tissue  
73 tropism and the ability to transduce both dividing and non-dividing cells, alteration of the rAAV  
74 capsid through rational design or library screening has become a common approach to further  
75 alter cellular tropism, increase tissue penetrance, or provide the ability to evade cellular  
76 proteolytic degradation and host immunity [13-15].

77 Owing to their ubiquity throughout the body and involvement in multiple local and  
78 systemic diseases, MVECs have long provided an attractive, if not challenging target for genetic  
79 modification. Recently, a rational design approach towards enhancing the tropism of rAAV for  
80 MVECs involving the incorporation of endothelial cell (EC)-targeting peptides into surface-  
81 exposed sites of the capsid resulted in greater affinity of rAAV2/2-based mutant vectors for ECs  
82 isolated from the human vena cava and MVECs in the murine brain and lungs[16-21]. Similarly,  
83 recent studies have shown that incorporation of EC-targeting peptide insertions into the rAAV2/9  
84 capsid can improve the transduction efficiency of human ECs harvested from the carotid artery *in*  
85 *vitro*[22, 23].

86 In this study, we follow a similar rational design approach towards vector engineering  
87 with the aim of enhancing the affinity of rAAV vectors for targeting MVECs within ocular tissues,  
88 including the choroid and retina. Specifically, we evaluate the transduction efficiencies of multiple  
89 rAAV2/2-, rAAV2/2[QuadYF+TV]-, and rAAV2/9-based vectors incorporating nine individual 7-mer  
90 EC-targeting peptides that have been demonstrated to significantly enhance tropism for MVECs  
91 in other tissues, including the mammalian brain and lung tissue[18, 19, 21, 24]. Following  
92 confirmation of packaging and transduction efficiency in *ex vivo* cultures of primary bovine  
93 MVECs, we assessed tropism of each EC-targeting (EC1-9 per serotype) capsid mutant vector and  
94 unmodified control expressing a ubiquitously expressing self-complementary green fluorescent  
95 protein (scGFP) reporter following intravitreal or intravenous injection in wild-type C57Bl/6J,  
96 using a combination of non-invasive ocular imaging and post-mortem histology.

97

## 98 **Methods**

### 99 **Animals**



100 Age-matched male and female C57BL/6 mice (N= 50, 25 males and 25 females) were purchased  
101 from the Jackson Laboratory (Bar Harbor, Maine). Mice were housed in the Biomedical Resource  
102 Center at the Medical College of Wisconsin (**MCW**) under a 12:12 light-dark cycle with food and  
103 water *ad libitum*. All animal protocols were reviewed and approved by the Medical College of  
104 Wisconsin Institutional Animal Care and Use Committee and conform with the National Institute  
105 of Health (**NIH**) and Association for Research in Vision and Ophthalmology (**ARVO**) guidelines for  
106 the Care and Use of Laboratory Animals.

107

#### 108 **Isolation of Primary Bovine Retinal Endothelial Cells**

109 Bovine eyes were harvested and purchased from Sierra-Medical (Whittier, CA, USA). A sterile  
110 work area was set up inside a laminar flow hood. Eyes were immersed in 1x betadine solution  
111 (Medline Industries, Northfield, IL) and rinsed in room temperature phosphate-buffered saline  
112 (**PBS**) (Gibco™, Dublin, Ireland) supplemented with 1% antibiotic/antimycotic solution. Eyes were  
113 dissected 5mm posterior to the limbus with a surgical blade. The retinae were gently removed  
114 from the eye cups, rinsed three times in PBS supplemented with 1% antibiotic/antimycotic  
115 solution, and collected in endothelial basal media (**EBM**) (Angio-Proteomie, Boston, MA)  
116 supplemented with 1% antibiotic/antimycotic solution. Retinae were homogenized in a rotary  
117 Teflon glass homogenizer, and the homogenate was filtered through a sterile 83µm mesh.  
118 Trapped tissue was collected and incubated in sterile EBM with collagenase (Gibco™, Dublin,  
119 Ireland) (0.5mg/mL), DNase I (Roche Diagnostic, Indianapolis, USA) (0.2mg/mL), and Pronase  
120 (Roche Diagnostic, Indianapolis, IN, USA) (0.2mg/mL) at 37 degrees Celsius with 5% CO<sub>2</sub> for 45  
121 minutes. After 45 minutes, the cell mixture was filtered through a 53µm mesh, and trapped tissue  
122 was collected in endothelial cell growth media (**EGM**) (Angio-Proteomie, Boston, MA, USA)  
123 supplemented with 1% antibiotic/antimycotic solution. Following centrifugation at 2000rpm for

124 10 minutes, the supernatant was discarded, and the cell pellet was resuspended in EGM. Cells  
125 were cultured on 0.1% gelatin coated plates at 37 degrees Celsius with 5% CO<sub>2</sub>.

126

### 127 **Recombinant rep-cap Plasmid Design**

128 Mutant AAV2-, AAV2[QuadYF+TV]-, and AAV9-based rep-cap plasmids incorporating individual  
129 heptameric peptides (EC1-10) (pACG2-[EC1-10], pACG2-QuadYF+TV-[EC1-10], and pACG9-[EC1-  
130 10]) were generated through site-directed mutagenesis (NEB Q5 site-directed mutagenesis kit;  
131 New England Biolabs, Ipswich, MA, USA). Specifically, using individually designed forward and  
132 reverse primers (Tables 1, 2, and 3), the individual heptameric peptides were inserted between  
133 amino acids N587 and R588 of the AAV2 and AAV2[QuadYF+TV] *cap genes* and between amino  
134 acids A589 and Q590 of the AAV9 *cap gene*[22, 25].

135

### 136 **In Vitro Screening of EC-Targeting Mutants**

#### 137 Vector Production

138 rAAV vector production was performed as previously described [26]. Briefly, HEK293T cells were  
139 triple transfected with an rAAV helper plasmid (pHelper); a ubiquitously expressing GFP reporter  
140 cassette (CBA-scGFP); and the appropriate EC-targeting mutant rep-cap plasmid (pACG2-[EC1-10],  
141 pACG2-QuadYF+TV-[EC1-10], or pACG9-[EC1-10]) or the unmodified rep-cap plasmids (pACG2,  
142 pACG2-QuadYF+TV, and pACG9) as control. Plasmids were transfected in equimolar ratios in high  
143 glucose DMEM (Gibco™, Dublin, Ireland) supplemented with 2% FBS and 1%  
144 antibiotic/antimycotic solution. HEK293T cells were harvested 72 hours post-transfection, and  
145 rAAV vector purification was performed by iodixanol density centrifugation and buffer exchange  
146 using 100kDa columns (Amicon, Darmstadt, Germany). The Virus was washed and eluted in Hank's  
147 balanced salt solution (Gibco™, Dublin, Ireland) containing 0.014% Tween-20 (Sigma-Aldrich, St.

148 Louis, MO, USA). Vector concentrations were determined using a PicoGreen assay (Thermo Fisher  
149 Scientific, Waltham, MA, USA).

150

### 151 **In Vitro Library Screen and Flow Cytometry**

152 Primary bovine retinal microvascular endothelial cells (**BMVECs**) were cultured at passage number  
153 two (P=2) in 0.1% gelatin-coated 24-well plates with EGM at 37 degrees Celsius with 5% CO<sub>2</sub>. At  
154 70% confluency, BVECs were infected in triplicates (75,000 MOI) with the mutant rAAV2/2-[EC1-  
155 10].CBA-sc.GFP, rAAV2/2[QuadYF+TV]-[EC1-10].CBA-sc.GFP, or rAAV2/9-[EC1-10].CBA-sc.GFP  
156 vectors, or unmodified rAAV2/2.CBA-sc.GFP, rAAV2/2[QuadYF+TV].CBA-sc.GFP, or rAAV2/9.CBA-  
157 sc.GFP vectors as control.

158 After 96 hours, transduced BMVEC cells were dissociated with TrypLE Express (Gibco™,  
159 Dublin, Ireland) into single cells and washed with PBS containing 10% fetal bovine serum (**FBS**)  
160 (Gibco™, Dublin, Ireland) and centrifuged at 200xg for 5 minutes. The pelleted cells were blocked  
161 with 0.5 ml incubation buffer (0.5% BSA, PBS) for 15 minutes at room temperature in a 5 mL round  
162 bottom polystyrene tube (Corning, Tewksbury, MA, USA). Next, Cells were rinsed in PBS  
163 containing 10% FBS and centrifuged at 200xg for 5 minutes prior to labeling them with the anti-  
164 mouse CD31 monoclonal primary antibody (5ug/1x10<sup>6</sup> cells, Invitrogen, Carlsbad, CA, USA) in  
165 incubation buffer for 90 minutes at room temperature (**RT**). After incubation, cells were rinsed (3  
166 times) with 2 ml incubation buffer and resuspended with anti-mouse Alexa Fluor 647 secondary  
167 antibody (1:2000, Invitrogen, Carlsbad, CA, USA) for 60 minutes at RT. The cells were then rinsed  
168 in the incubation buffer (3 times) and resuspended in the Flowcytometry buffer (Ca/Mg<sup>2+</sup> Free  
169 PBS, 2% FBS, 0.1% Sodium Azide). Cells were quantified by LSR-II (BD Biosciences, San Jose, CA,  
170 USA), and, using flow cytometry analysis software (FlowJo v10.7.2), transduction efficiency was

171 quantified as the percentage of GFP+CD31+ cells normalized to the total percentage of CD31+  
172 cells in the sample.

173

## 174 ***In Vivo* Assessment of Transduction and Tissue Tropism**

### 175 **Virus Production**

176 High titer rAAV2/2.CBA-eGFP, rAAV2/9.CBA-eGFP, rAAV2/2[QuadYF+TV].CBA-eGFP. rAAV2/2-  
177 EC5.CBA-eGFP, rAAV2/9-EC5.CBA-eGFP, rAAV2/2[QuadYF+TV]-EC.CBA-eGFP.were manufactured  
178 by Dr. Boye at the University of Florida College of Medicine and eluted in TMN200-P (200mM  
179 NaCl, 1mM MgCl<sub>2</sub>, 20mM Tris, pH adjusted to 8.0 and supplemented with 0.001% F68 Pluronic).

180

### 181 **Intravitreal and Retro-orbital Injections**

182 Intravitreal and retro-orbital injections were performed under isoflurane anesthesia. Anesthesia  
183 was induced using 5% isoflurane in 100% oxygen before being reduced to 2% isoflurane for  
184 maintenance. Pupils were dilated using a combination of 2.5% phenylephrine (Paragon BioTeck,  
185 Portland, OR) and 1% tropicamide (Akorn, Lake Forest, IL). The moisture of the eye was  
186 maintained during imaging using Systane Ultra lubricant eye drops (Alcon Inc., Fort Worth, TX).

187 Using a 33-gauge needle and Hamilton syringe, cohorts of age-matched male and female  
188 C57BL/6 mice (N=6 mice for each vector, 3 male and 3 female) received 2μL of any one rAAV  
189 vector (~2.5x10<sup>12</sup>vg/mL) through bilateral intravitreal injections. Using a zero-volume syringe and  
190 28-gauge needle (BD PrecisionGlide Needle, BD, Franklin Lakes, NJ, USA), age-matched C57BL/6  
191 mice (N=2, one male and one female) received 150μL of any one rAAV vector (~2.5x10<sup>12</sup> vg/mL)  
192 through retro-orbital injection.

193

### 194 **Ocular imaging**

195 Four months post-injection, all study animals were imaged using a custom multiline confocal  
196 scanning laser ophthalmoscope (cSLO; modified Spectralis HRA, Heidelberg Engineering,  
197 Heidelberg, Germany). Camera alignment was performed using near-infrared (820nm) reflectance  
198 imaging. Retinal images of vector-derived GFP fluorescence (482nm excitation; 502-537nm  
199 bandpass) were obtained and processed for false color using ImageJ software (NIH).

200

### 201 **Cryosection and immunostaining:**

202 Four weeks postinjection, mice were euthanized by transcardial perfusion under terminal  
203 anesthesia. In short, anesthetized mice were fixed in a supine position, and a thoracotomy was  
204 performed. First, 10 ml of PBS followed by 10 ml of 4% PFA was perfused into the left ventricle,  
205 and the right atrium was resected. As the fixative (PFA) enters, the body stiffens, and the liver  
206 turns pale, indicating a successful perfusion procedure. After perfusion, organs were harvested,  
207 cryoprotected in 30% sucrose overnight at 4°C, embedded in the optimal cutting temperature  
208 medium, and stored at -80°C until cryo-sectioned. Cryo-sections (12 µm) were made with a  
209 cryostat microtome system (Leica, Germany) and stored at -20° C before antibody staining.  
210 Sections were permeabilized with 1x PBS containing 0.2% Triton-X for 20 minutes, stained with  
211 nuclear stain DAPI (1 in 10,000), and washed with 1xPBS (3 times) for 15 mins. Slides were imaged  
212 for native GFP signal and DAPI nuclear stain on a fluorescence microscope (EVOS M5000,  
213 Invitrogen).

214

## 215 **Results**

216 **Screening transduction efficiency of rAAV vectors containing EC-targeting heptameric peptide**  
217 **insertions in primary bovine VECs**

218 Insertion of heptameric peptides between amino acid positions 587/588 in rAAV2/2-based  
219 capsids interferes with two (R585 and R588) of the five positively charged amino acids that has  
220 been identified for HSPG binding [27, 28]. However, a net positive charge of the inserted peptide,  
221 i.e., “bulkiness” of the inserted residues, and proximity of an arginine or alternative positively-  
222 charged residue at the R588 position may reconstitute HSPG binding [29]. Heptameric peptide  
223 inserts EC1, EC2, EC3, and EC6 have a net negative charge at pH 7, while inserts EC4, EC5, and EC7  
224 have a net neutral charge, and EC8 and EC9 have net positive charges (Table 4). Inserts EC8 and  
225 EC9 also have a positively charged arginine residue within one amino acid position of R588, while  
226 EC3 carries a positively charged histidine residue separated by three amino acid residues from  
227 R588. As a result of differences in charge and ‘bulkiness’ of each 7-mer peptide, we anticipated  
228 that their incorporation into rAAV2/2, rAAV2/2[QuadYF-TV] or rAAV2/9 [at positions 588 (2/2  
229 and 2/2[QuadYF-TV] or 589 (2/9) of the virus protein (VP1-3)] virions may adversely affect  
230 packaging and infectivity of each EC mutant (EC1 – EC9) compared to unmodified controls.  
231 Following optimization of multiplicity of infection (MOI) in HEK293T (MOI=50,000) and primary  
232 bovine MVECs (BMVECs; MOI=75,000) for each serotype (rAAV2/2, rAAV2/2[QuadYF-TV] and  
233 rAAV2/9), we confirmed that the preparations of each EC mutant vector (EC1-9) were infectious  
234 (Figs 1A and B), as evidenced by robust GFP expression after a period of 72-hours (Supplemental  
235 Fig 1). Subsequently, primary BMVECs were transduced with rAAV2/2-EC1-9, rAAV2/2[QuadYF-  
236 TV]-EC1-9 or rAAV2/9-EC1-9 vectors (N=3 wells per mutant, N=27 mutants) or unmodified  
237 rAAV2/2, rAAV2/2[QuadYF-TV] or rAAV2/9 (N=3 wells per capsid; Fig 2). Transduction efficiency  
238 was quantified 96 hours after vector supplementation by calculating the percentage of GFP<sup>+</sup>CD31<sup>+</sup>  
239 cells normalized to the total percentage of CD31<sup>+</sup> cells in each sample, allowing the fold-change  
240 decrease/increase in transduction efficiency of each mutant vector to be compared to the  
241 transduction efficiency of its respective, unmodified parental serotype. rAAV2/2-based mutants

242 with fold-changes greater than 1x included: rAAV2/2-EC1 (2.1x), rAAV2/2-EC5 (2.72x), rAAV2/2-  
243 EC6 (1.57x), (Fig 3E). Notable rAAV2/2[QuadYF+TV]-based mutants included:  
244 rAAV2/2[QuadYF+TV]-EC2 (1.15x), rAAV2/2[QuadYF+TV]-EC4 (2.77x), rAAV2/2[QuadYF+TV]-EC5  
245 (3.68x), rAAV2/2[QuadYF+TV]-EC6 (7.82x) (Fig 3E). Notable rAAV2/9-based mutants included:  
246 rAAV2/9-EC5 (1.72) (Fig 3E).

247 Interestingly, rAAV vectors incorporating EC5 performed better than their respective  
248 unmodified control vectors for all serotypes evaluated, and therefore, vectors incorporating EC5  
249 were selected for further studies to determine their transduction and tissue tropism, *in vivo*.

250

#### 251 **Retinal transduction following retro-orbital or intravitreal injection of EC-mutant vectors**

252 After determining that EC5-containing capsid mutant vectors out-performed the parental strains  
253 for all serotypes, rAAV2/2-EC5, rAAV2/2[QuadYF-TV]-EC5 and rAAV2/9-EC5 mutants and  
254 unmodified control vectors were administered systemically to characterize both the ocular and  
255 systemic tropism. Unilateral retro-orbital injections (100 $\mu$ L,  $\sim$ 3.75x10<sup>11</sup>vg per mouse) were  
256 performed in age-matched C57BL/6 mice (N = 6 male, N=6 female) with each vector packaging a  
257 ubiquitously expressing enhanced GFP (**eGFP**) reporter cassette. Twelve-weeks post-injection,  
258 eyes were imaged using confocal scanning laser ophthalmoscopy (cSLO) with near-infrared  
259 reflectance (NIR; 820nm) and autofluorescence (AF; 488nm) modalities to assess for evidence of  
260 ocular damage or vector-mediated eGFP expression, respectively (Fig 4). NIR imaging  
261 (Supplemental Fig 2) demonstrated no evidence of ocular injury following high volume vector  
262 injection into the retro-orbital venous sinus. AF imaging revealed widespread punctate signals  
263 throughout the neural retina in both unmodified and EC mutant injected eyes, potentially  
264 indicative of macrophage infiltration. In rAAV2/2-EC5, rAAV2/2[QuadYF-TV]-EC5 and rAAV2/9-  
265 EC5 mutant injected animals, increased fluorescence signal was observed along the vessel walls

266 (red arrows, Fig 4), specifically in the vicinity of the optic nerve head, indicating moderately  
267 increased levels of retinal vascular transduction compared to unmodified rAAV2/2,  
268 rAAV2/2[QuadYF-TV] and rAAV2/9 injected animals.

269 Intravitreally injected eyes revealed differential expression patterns in all EC-mutant  
270 injected eyes relative to unmodified controls. Specifically, rAAV2/2-EC5 and rAAV2/2[QuadYF-  
271 TV]-EC5 injected eyes demonstrated reduced transduction of retinal ganglion cells, as identified  
272 by fewer axonal projections extending from the periphery towards the optic disc (yellow arrows,  
273 Fig 4), and more focal transduction centered around the optic nerve head than in eyes injected  
274 with unmodified vectors (Fig 4). rAAV2/9-EC5 mutant injected eyes demonstrated the most  
275 altered transduction, with the greatest concentration of GFP signal occurring in cells immediately  
276 surrounding the major retinal blood vessels (blue arrows, Fig 4).

277

#### 278 **Systemic transduction following retro-orbital or intravitreal injection of EC-mutant vectors**

279 In addition to determining the extent of ocular vascular transduction following retro-orbital or  
280 intravitreal injection of rAAV2/2-EC5, rAAV2/2[QuadYF-TV]-EC5 or rAAV2/9-EC5, several organs  
281 (notably, the liver, heart and lungs) were harvested from all animals and examined for evidence  
282 of GFP expression localized in blood vessels or proximal structures. GFP expression was observed  
283 in the liver in all retro-orbital injected animals, but was especially prominent in those  
284 administered rAAV2/2[QuadYF-TV]-EC5 or rAAV2/9-EC5, with high levels of expression  
285 surrounding the hepatic vessels (white arrows) and bile ducts (Fig 5, bottom panel, J & L).  
286 Interestingly, rAAV2/9-EC5 animals injected intravitreally also demonstrated evidence of GFP  
287 expression in the liver, indicating widespread virion escape from the eye into the systemic  
288 circulation (Fig 5, upper panel, F & L). In addition to targeting the liver, rAAV2/2[QuadYF-TV]-EC5  
289 and rAAV2/9-EC5 mutants demonstrated a moderate ability to transduce lung tissue following



290 retro-orbital injection (Fig 6, bottom panel, J and K). Meanwhile rAAV2/2[QuadYF-TV]-EC5  
291 showed dramatically increased tropism for cardiac muscle compared to the unmodified  
292 rAAV2/2[QuadYF-TV] parent serotype (Fig 7, bottom panel, D and J). Intravitreal injection of all  
293 vectors resulted in an absence of observable fluorescence signal in the lungs and hearts of all  
294 animals.

295

## 296 Discussion

297 rAAV vectors have successfully enabled safe and efficient gene delivery for the treatment of  
298 various ocular diseases, such as Leber's congenital amaurosis (**LCA**)[9, 30-32], Leber's hereditary  
299 optic neuropathy[33], and choroideremia[34]. Despite progress, the application of rAAV vectors  
300 for the treatment of complex retinal vascular diseases is severely limited by the absence of rAAV  
301 vectors capable of robustly transducing MVECs, a critical cell type, the dysfunction of which  
302 underlies pathology in several diseases, including diabetic retinopathy and age-related macular  
303 degeneration. Herein, we screened multiple capsid mutant rAAV vectors containing heptameric  
304 peptide insertions designed to increase endothelial cell targeting and uptake. Initial evaluations  
305 were performed *in vitro* using HEK293T and BMVECs cultures to determine infectivity and identify  
306 mutants with the greatest tropism for CD31+ endothelial cells, and subsequently *in vivo* following  
307 either intravitreal or retro-orbital (intravenous) injection in wild-type mice using a combination of  
308 non-invasive imaging and post-mortem histology. Engraftment of the EC5 peptide (SGNSGAA) into  
309 the capsid of rAAV2/2, rAAV2/2[QuadYF-TV] and rAAV2/9 resulted in infectious virions with  
310 altered tropism, including moderately increased transduction of the retinal vasculature  
311 (rAAV2/2[QuadYF-TV]-EC5) and liver vasculature (rAAV2/2[QuadYF-TV]-EC5 and rAAV2/9-EC5),

312 and dramatic increased transduction of heart muscle (rAAV2/2[QuadYF-TV]-EC5) following  
313 intravenous administration.

314           Insertion of the heptameric peptides was carried out between amino acid positions N587  
315 and R588 of the rAAV2/2 and rAAV2/2[QuadYF-TV] *cap* genes (A589 and Q590 in rAAV2/9), which  
316 is known to cause disruption of the AAV2 virion's HSPG-binding motif and impair infection;  
317 however, the combination of reduced HSPG-binding affinity and insertion of a cell-targeting  
318 peptide is likely to yield a vector with re-directed tropism compared to the parental strain[35].  
319 Indeed, several studies have previously identified rAAV capsid mutant vectors demonstrating  
320 enhanced transduction of MVECs in mammalian lungs and the brain following the insertion of  
321 similar EC-targeting heptameric peptides into the surface-exposed loop domains of the virion's  
322 structural proteins; however, none of these studies have described the transduction efficiencies  
323 of such EC-targeting rAAV mutant vectors in retinal MVECs [16-21].

324           The heptameric peptides used for this study were selected based on their ability to  
325 transduce MVECs and macrovascular ECs with high efficiency in non-ocular systems. For example,  
326 Körbelin et al. (2016) demonstrated systemic administration of rAAV2-based vectors  
327 incorporating heptameric peptides with sequence motifs XXGXXWX substantially improved  
328 transduction of murine brain microvasculature (peptide inserts EC1 and EC2) and cardiac tissue  
329 (EC2)[21]. Körbelin et al. (2016b) also identified a rAAV2-based vector incorporating EC3 that  
330 mediated strong lung MVEC-specific expression of GFP (>200 times greater than rAAV2/2)  
331 following systemic administration in mice[21]. Interestingly however, in the present study,  
332 vectors incorporating this same peptide insertion (rAAV2/2-EC3, rAAV2/9-EC3, and  
333 rAAV2/2[QuadYF+TV]-EC3) were amongst the least efficient at targeting primary BMVECs *in vitro*  
334 (Figs 2 and 3), with all mutants demonstrating lower transduction than their unmodified parental  
335 strains regardless of serotype. While we have not evaluated the rAAV EC-mutant vectors on

336 MVECs harvested from organs other than the retina – as our primary focus was to increase gene  
337 delivery efficiency to the retinal vasculature – this discrepancy highlights the heterogeneity of  
338 endothelial cells throughout the body and the importance of screening on the relevant primary  
339 tissues.

340         Based on the *in vitro* screening there appears to be a broad discrepancy between the GFP  
341 expression observed on fluorescent imaging (Fig 2) and flow cytometry data (Fig 3), where for  
342 example rAAV2/2[QuadYF-TV]-EC6 does not visibly appear to exhibit significantly greater levels of  
343 transduction than either rAAV2/2-EC6 and rAAV2/9-EC6 mutants, but demonstrates a ~7.5-fold  
344 increase in BMVEC transduction when measured via flow cytometry. This discrepancy almost  
345 certainly arises from the primary BMVECs cultures being comprised of a mixed population of ECs  
346 and non-ECs arising from the size exclusion approach used for isolation following dissociation of  
347 the retinal vasculature ([36, 37]). As such, GFP expression observed via fluorescence microscopy  
348 may arise either from transduction of BMVECs or contaminating neuronal/glial cells. By contrast,  
349 flow cytometry was performed using co-staining with the CD31 endothelial-specific cell-marker  
350 and as such, we believe that this data more accurately represents the affinity of each EC mutant  
351 for retinal endothelial cells within the retina.

352         Based on the performance of EC-targeting peptides at transducing primary cells isolated  
353 from bovine retinae *in vitro*, we identified insert EC5 as the most promising EC-targeting peptide  
354 for subsequent *in vivo* assessment. Notably, while the EC6 peptide insertion (ESGLSQS)  
355 demonstrated up ~7.5-fold increase in BMVECs when engrafted onto the rAAV2/2[QuadYF-TV]  
356 capsid, only the EC5 peptide insertion conferred increased transduction efficiency across all three  
357 serotypes examined, indicating it may mediate a broad serotype-independent increase in  
358 endothelial cell affinity. Following intravitreal injection of EC mutants into wild-type C57BL/6j  
359 mice, we observed a subtle alteration of tropism on cSLO imaging, with fluorescence signal more

360 concentrated around the larger blood vessels and optic disc; however, no evidence of vascular or  
361 endothelial transduction was noted for any serotype. This finding was largely expected, where  
362 inclusion of any EC-targeting peptide into the capsid is likely only to increase transduction when  
363 the virion has direct access the endothelial cell membrane from the lumen (i.e., from within the  
364 lumen) and is not likely to increase vascular penetrance from the extra-luminal vitreous aspect.

365 By contrast, intravenous injection of EC-mutants resulted in some evidence of vascular  
366 transduction on cSLO imaging, with increased fluorescence signal apparent in the vessel walls  
367 localized proximal to the optic disc, where virions would be expected to enter the eye at the  
368 highest dose following injection into the retro-orbital venous sinus.

369 The most dramatic increase in transduction efficiency was observed not in the eye, but in  
370 the heart of rAAV2/2[QuadYF-TV]-EC5 injected animals, with robust and widespread GFP  
371 expression throughout the cardiac muscle compared to the parental rAAV2/2[QuadYF-TV] vector.  
372 The EC5 mutant was initially identified during a biopanning experiment aimed at targeting solid  
373 tumors in breast cancer, alongside two other peptide insertions also evaluated herein, namely  
374 EC4 (GEARISA) and EC6 (ESGLSQS).[18] While insertions EC4 and EC6 were observed in  
375 Michelfelder et al (2009) to result in increased heart transduction, mutant EC5 (SGNSGAA) was  
376 not evaluated beyond the initial library screen, and as such the increased heart muscle  
377 transduction observed herein with this peptide insertion was not identified. That dramatically  
378 increased heart transduction was observed following EC5 insertion into rAV2/2[QuadYF-TV], but  
379 not unmodified rAAV2/2, indicating that further disruption of HSPG-binding, which is already  
380 weakened in the former, may be necessary for cardiac tropism. Indeed, a previous study has  
381 shown that enhanced heart transduction was observed upon modification of the capsid VP3  
382 region at position R588 to reduce HSPG binding and this region contributes to heart tropism [38]  
383 [16, 39]. However, that Michelfelder et al (2009) noted no significant upregulation of cardiac

384 tropism when a random peptide (VRRPRFW) was inserted at position R588 of rAAV2/2 strongly  
385 suggests that the hydrophobicity (EC5 = neutral; random = hydrophobic) or overall net-charge  
386 (EC5 = 0.00; random = 3.00, both at pH7.0) of the insert is also important for increasing cardiac  
387 tropism, rather than simply disrupting HSPG binding affinity (Table 4).

388

## 389 ACKNOWLEDGMENTS

390 The authors thank Christine Skumatz, Lisa King, Joseph Thulin, and the Biomedical Resource  
391 Center staff for the animal care. Grants from the National Eye Institute supported this work.....

392

## 393 AUTHOR CONTRIBUTIONS

394 R.P, D.P, and D.M.L. designed and conducted the experiments and wrote the paper. S.E.B. and  
395 S.L.B provided purified vectors for *in vivo* injections and reviewed the manuscript.

396

397

## 398 Reference

399

- 400 1. Brand, C.S., *Management of retinal vascular diseases: a patient-centric*  
401 *approach*. Eye (Lond), 2012. **26 Suppl 2**(Suppl 2): p. S1-16.
- 402 2. Schalkwijk, C.G. and C.D. Stehouwer, *Vascular complications in diabetes*  
403 *mellitus: the role of endothelial dysfunction*. Clin Sci (Lond), 2005. **109**(2): p.  
404 143-59.
- 405 3. Sena, C.M., A.M. Pereira, and R. Seica, *Endothelial dysfunction - a major*  
406 *mediator of diabetic vascular disease*. Biochim Biophys Acta, 2013. **1832**(12): p.  
407 2216-31.
- 408 4. Bandello, F., et al., *Pathophysiology and treatment of diabetic retinopathy*. Acta  
409 Diabetol, 2013. **50**(1): p. 1-20.
- 410 5. Falavarjani, K.G. and Q.D. Nguyen, *Adverse events and complications associated*  
411 *with intravitreal injection of anti-VEGF agents: a review of literature*. Eye  
412 (Lond), 2013. **27**(7): p. 787-94.
- 413 6. Homme, R.P., et al., *Remodeling of Retinal Architecture in Diabetic Retinopathy:*  
414 *Disruption of Ocular Physiology and Visual Functions by Inflammatory Gene*  
415 *Products and Pyroptosis*. Front Physiol, 2018. **9**: p. 1268.
- 416 7. Ratnapriya, R., et al., *Retinal transcriptome and eQTL analyses identify genes*  
417 *associated with age-related macular degeneration*. Nat Genet, 2019. **51**(4): p.  
418 606-610.

- 419 8. Daya, S. and K.I. Berns, *Gene therapy using adeno-associated virus vectors*. Clin  
420 Microbiol Rev, 2008. **21**(4): p. 583-93.
- 421 9. Cideciyan, A.V., et al., *Human RPE65 gene therapy for Leber congenital*  
422 *amaurosis: persistence of early visual improvements and safety at 1 year*. Hum  
423 Gene Ther, 2009. **20**(9): p. 999-1004.
- 424 10. Kuzmin, D.A., et al., *The clinical landscape for AAV gene therapies*. Nat Rev  
425 Drug Discov, 2021. **20**(3): p. 173-174.
- 426 11. Kattenhorn, L.M., et al., *Adeno-Associated Virus Gene Therapy for Liver Disease*.  
427 Hum Gene Ther, 2016. **27**(12): p. 947-961.
- 428 12. Fischell, J.M. and P.S. Fishman, *A Multifaceted Approach to Optimizing AAV*  
429 *Delivery to the Brain for the Treatment of Neurodegenerative Diseases*. Front  
430 Neurosci, 2021. **15**: p. 747726.
- 431 13. Zhong, L., et al., *Next generation of adeno-associated virus 2 vectors: point*  
432 *mutations in tyrosines lead to high-efficiency transduction at lower doses*. Proc  
433 Natl Acad Sci U S A, 2008. **105**(22): p. 7827-32.
- 434 14. Aslanidi, G.V., et al., *Optimization of the capsid of recombinant adeno-associated*  
435 *virus 2 (AAV2) vectors: the final threshold?* PLoS One, 2013. **8**(3): p. e59142.
- 436 15. Ling, C., et al., *Enhanced transgene expression from recombinant single-stranded*  
437 *D-sequence-substituted adeno-associated virus vectors in human cell lines in*  
438 *vitro and in murine hepatocytes in vivo*. J Virol, 2015. **89**(2): p. 952-61.
- 439 16. White, S.J., et al., *Targeted gene delivery to vascular tissue in vivo by tropism-*  
440 *modified adeno-associated virus vectors*. Circulation, 2004. **109**(4): p. 513-9.
- 441 17. Stachler, M.D. and J.S. Bartlett, *Mosaic vectors comprised of modified AAV1*  
442 *capsid proteins for efficient vector purification and targeting to vascular*  
443 *endothelial cells*. Gene Ther, 2006. **13**(11): p. 926-31.
- 444 18. Michelfelder, S., et al., *Successful expansion but not complete restriction of*  
445 *tropism of adeno-associated virus by in vivo biopanning of random virus display*  
446 *peptide libraries*. PLoS One, 2009. **4**(4): p. e5122.
- 447 19. Korbelin, J., et al., *A brain microvasculature endothelial cell-specific viral vector*  
448 *with the potential to treat neurovascular and neurological diseases*. EMBO Mol  
449 Med, 2016. **8**(6): p. 609-25.
- 450 20. Nicklin, S.A., et al., *Efficient and selective AAV2-mediated gene transfer directed*  
451 *to human vascular endothelial cells*. Mol Ther, 2001. **4**(3): p. 174-81.
- 452 21. Korbelin, J., et al., *Pulmonary Targeting of Adeno-associated Viral Vectors by*  
453 *Next-generation Sequencing-guided Screening of Random Capsid Displayed*  
454 *Peptide Libraries*. Mol Ther, 2016. **24**(6): p. 1050-1061.
- 455 22. Varadi, K., et al., *Novel random peptide libraries displayed on AAV serotype 9 for*  
456 *selection of endothelial cell-directed gene transfer vectors*. Gene Ther, 2012.  
457 **19**(8): p. 800-9.
- 458 23. Chen, Q., et al., *Recombinant adeno-associated virus serotype 9 in a mouse model*  
459 *of atherosclerosis: Determination of the optimal expression time in vivo*. Mol  
460 Med Rep, 2017. **15**(4): p. 2090-2096.
- 461 24. Buning, H. and A. Srivastava, *Capsid Modifications for Targeting and Improving*  
462 *the Efficacy of AAV Vectors*. Mol Ther Methods Clin Dev, 2019. **12**: p. 248-265.
- 463 25. Girod, A., et al., *Genetic capsid modifications allow efficient re-targeting of*  
464 *adeno-associated virus type 2*. Nat Med, 1999. **5**(12): p. 1438.

- 465 26. Reid, C.A. and D.M. Lipinski, *Small and Micro-Scale Recombinant Adeno-*  
466 *Associated Virus Production and Purification for Ocular Gene Therapy*  
467 *Applications*. Methods Mol Biol, 2018. **1715**: p. 19-31.
- 468 27. Kern, A., et al., *Identification of a heparin-binding motif on adeno-associated*  
469 *virus type 2 capsids*. J Virol, 2003. **77**(20): p. 11072-81.
- 470 28. Opie, S.R., et al., *Identification of amino acid residues in the capsid proteins of*  
471 *adeno-associated virus type 2 that contribute to heparan sulfate proteoglycan*  
472 *binding*. J Virol, 2003. **77**(12): p. 6995-7006.
- 473 29. Perabo, L., et al., *Heparan sulfate proteoglycan binding properties of adeno-*  
474 *associated virus retargeting mutants and consequences for their in vivo tropism*. J  
475 Virol, 2006. **80**(14): p. 7265-9.
- 476 30. Bainbridge, J.W., et al., *Effect of gene therapy on visual function in Leber's*  
477 *congenital amaurosis*. N Engl J Med, 2008. **358**(21): p. 2231-9.
- 478 31. Jacobson, S.G., et al., *Night vision restored in days after decades of congenital*  
479 *blindness*. iScience, 2022. **25**(10): p. 105274.
- 480 32. Jacobson, S.G., et al., *Safety and improved efficacy signals following gene*  
481 *therapy in childhood blindness caused by GUCY2D mutations*. iScience, 2021.  
482 **24**(5): p. 102409.
- 483 33. Feuer, W.J., et al., *Gene Therapy for Leber Hereditary Optic Neuropathy: Initial*  
484 *Results*. Ophthalmology, 2016. **123**(3): p. 558-70.
- 485 34. MacLaren, R.E., et al., *Retinal gene therapy in patients with choroideremia:*  
486 *initial findings from a phase 1/2 clinical trial*. Lancet, 2014. **383**(9923): p. 1129-  
487 37.
- 488 35. Zhang, L., et al., *Capsid Engineering Overcomes Barriers Toward Adeno-*  
489 *Associated Virus Vector-Mediated Transduction of Endothelial Cells*. Hum Gene  
490 Ther, 2019. **30**(10): p. 1284-1296.
- 491 36. Lertkiatmongkol, P., et al., *Endothelial functions of platelet/endothelial cell*  
492 *adhesion molecule-1 (CD31)*. Curr Opin Hematol, 2016. **23**(3): p. 253-9.
- 493 37. Liu, L. and G.P. Shi, *CD31: beyond a marker for endothelial cells*. Cardiovasc  
494 Res, 2012. **94**(1): p. 3-5.
- 495 38. Muller, O.J., et al., *Random peptide libraries displayed on adeno-associated virus*  
496 *to select for targeted gene therapy vectors*. Nat Biotechnol, 2003. **21**(9): p. 1040-  
497 6.
- 498 39. Work, L.M., et al., *Vascular bed-targeted in vivo gene delivery using tropism-*  
499 *modified adeno-associated viruses*. Mol Ther, 2006. **13**(4): p. 683-93.
- 500



Figure 1

**A**

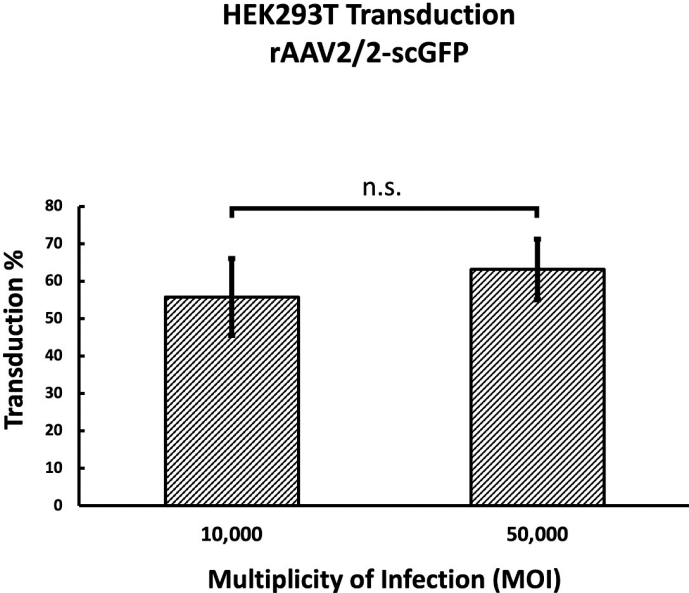

**B**

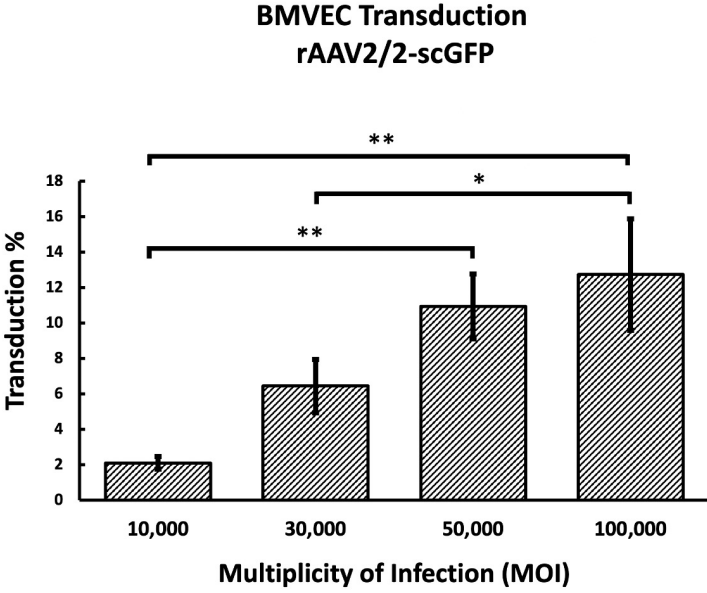



Figure 2

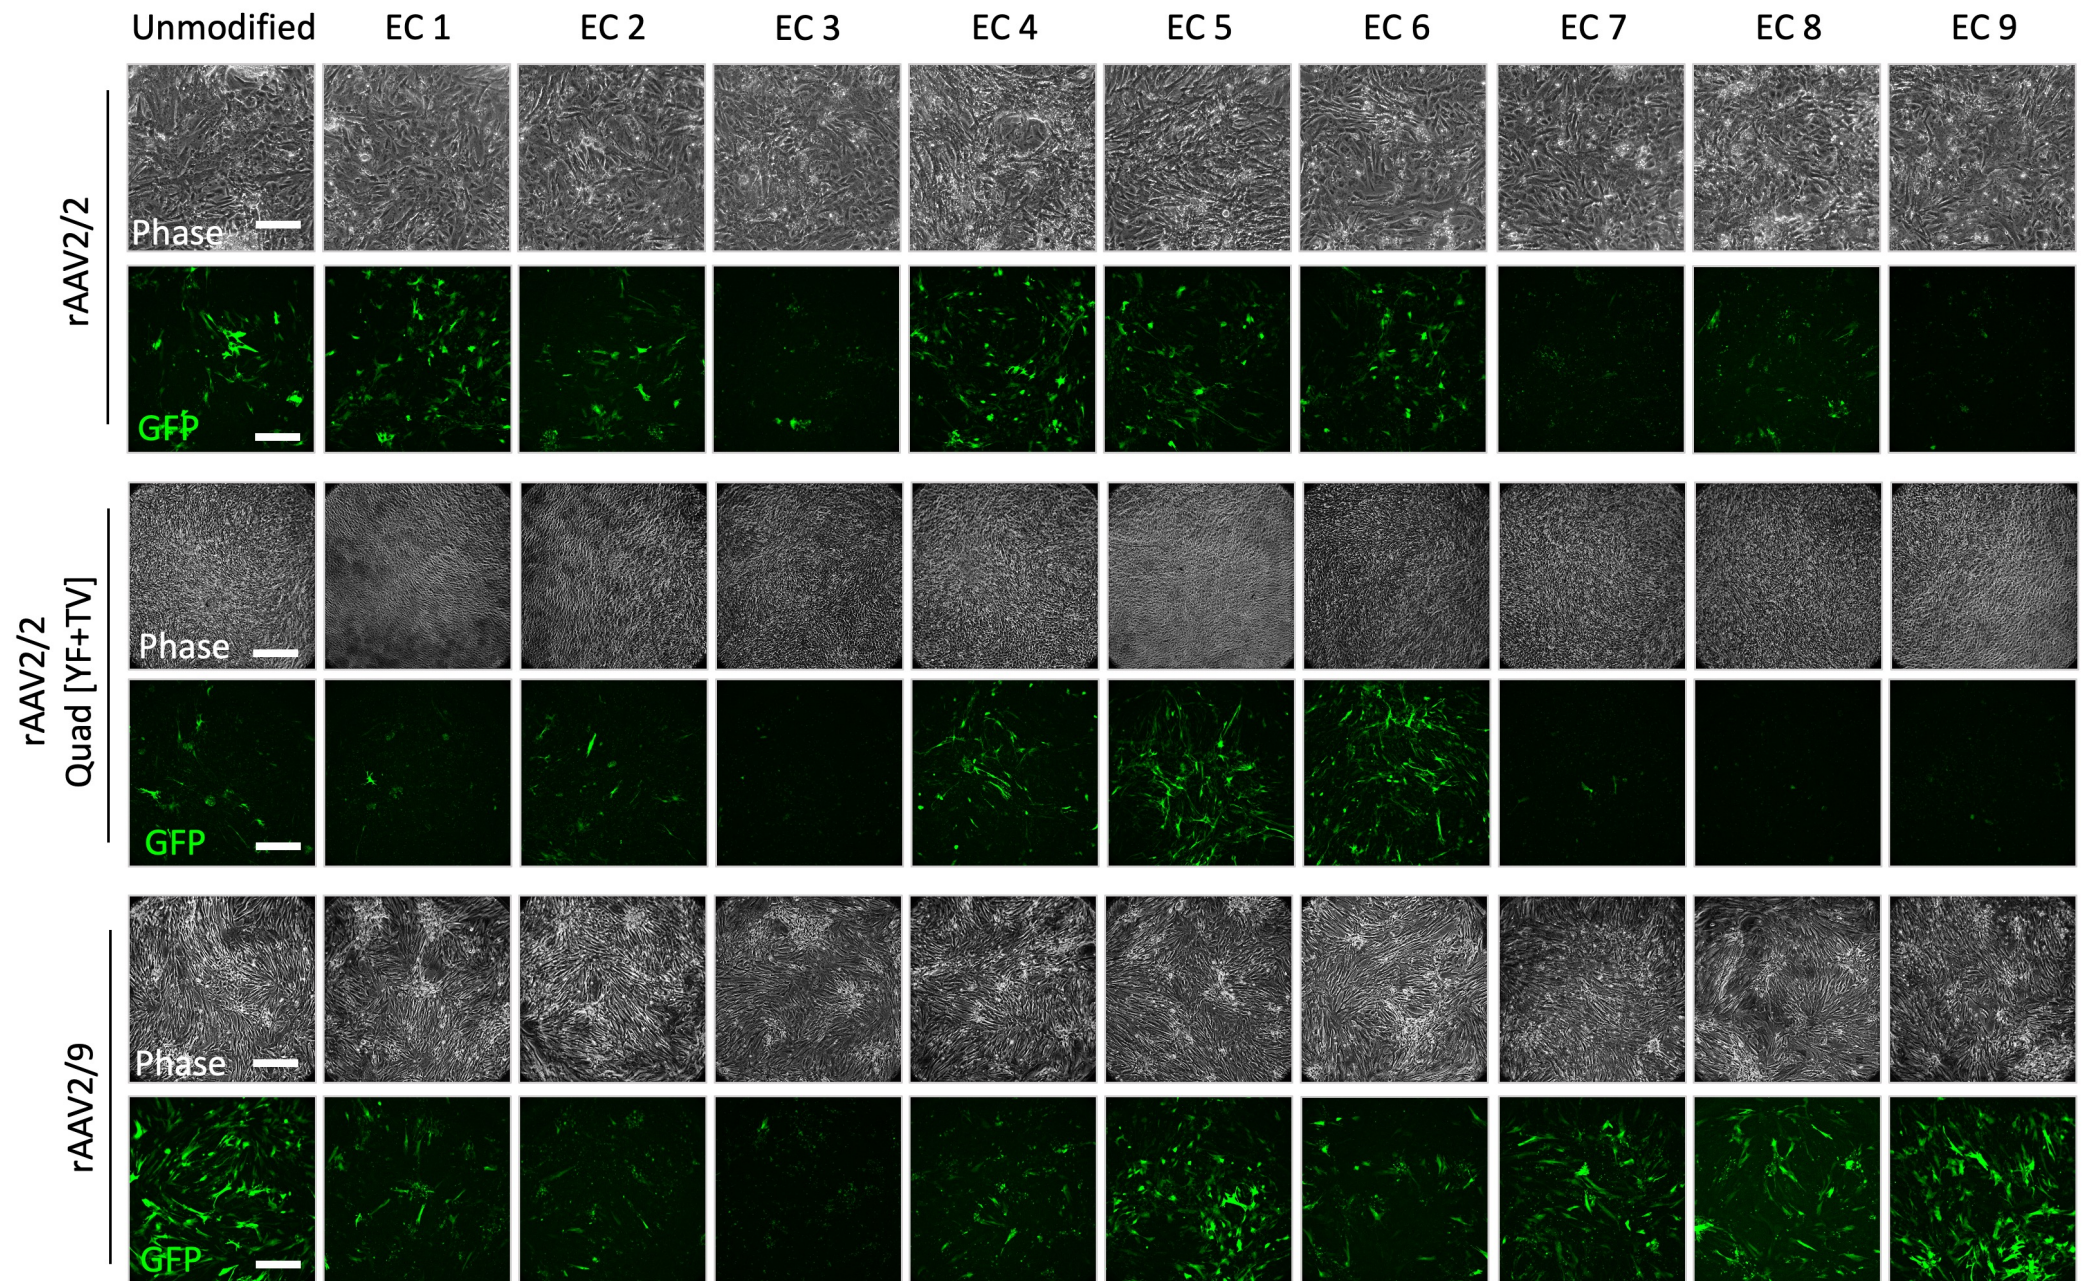



Figure 3

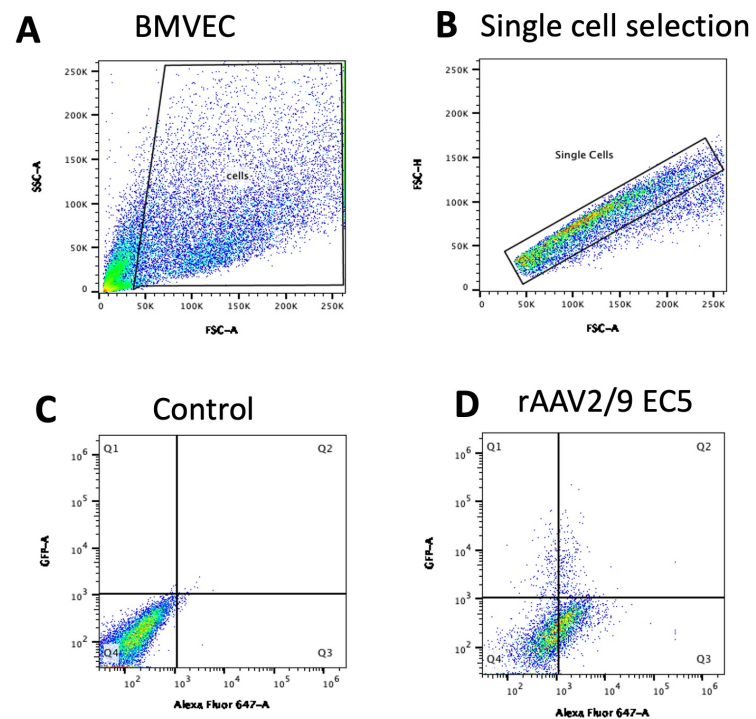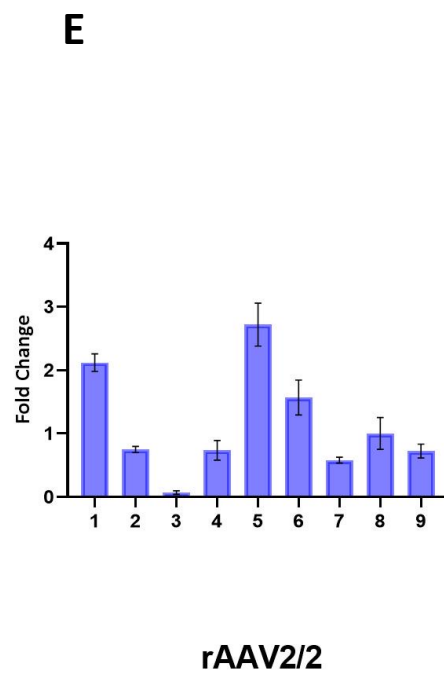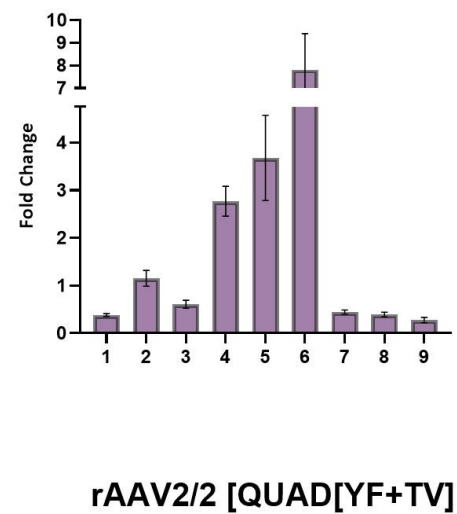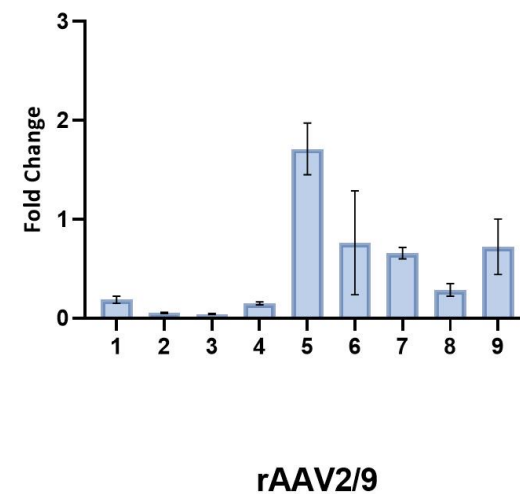

Figure 4

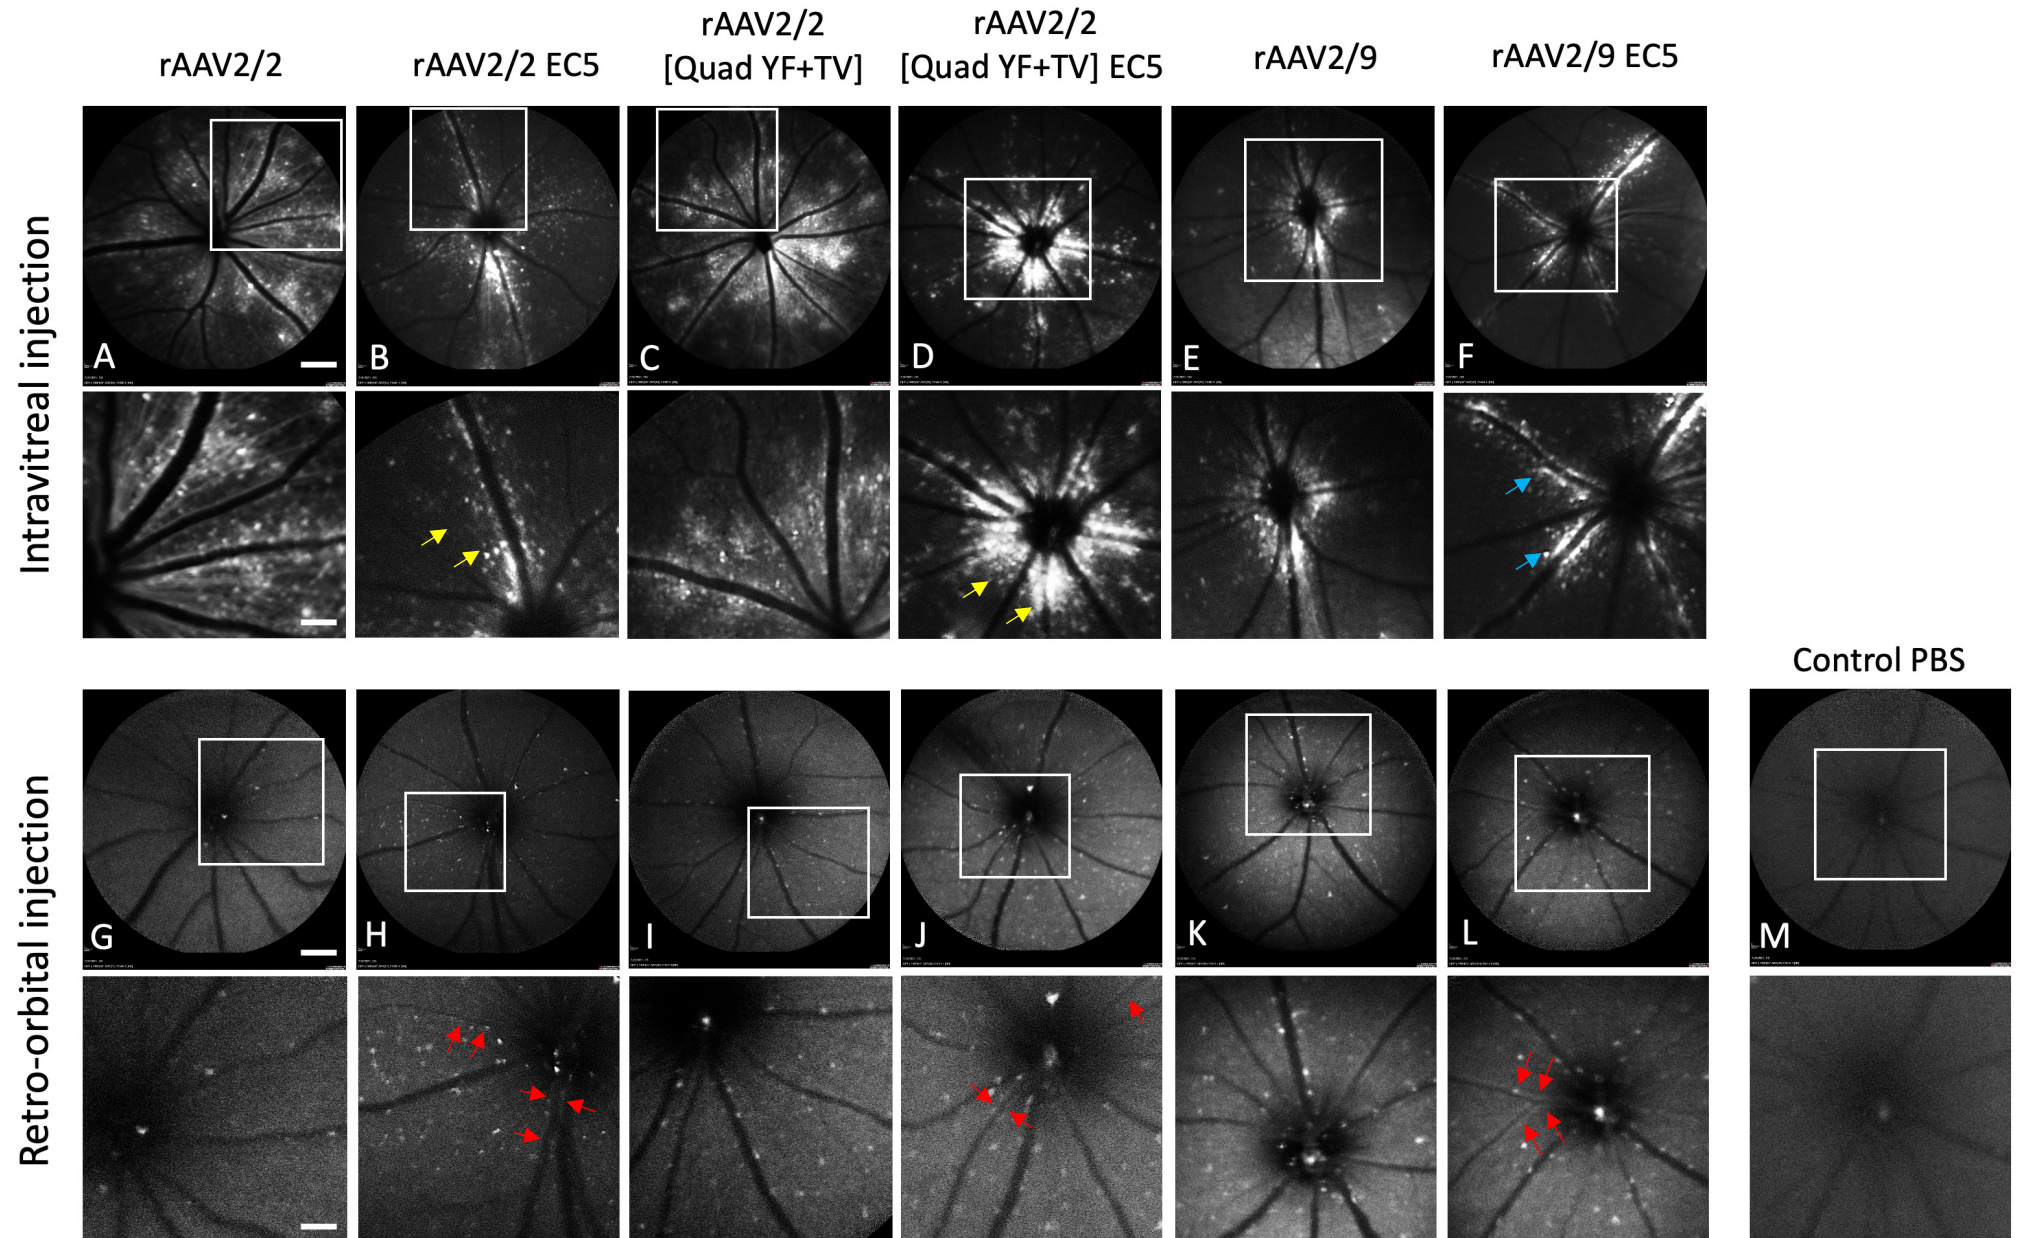



Figure 5

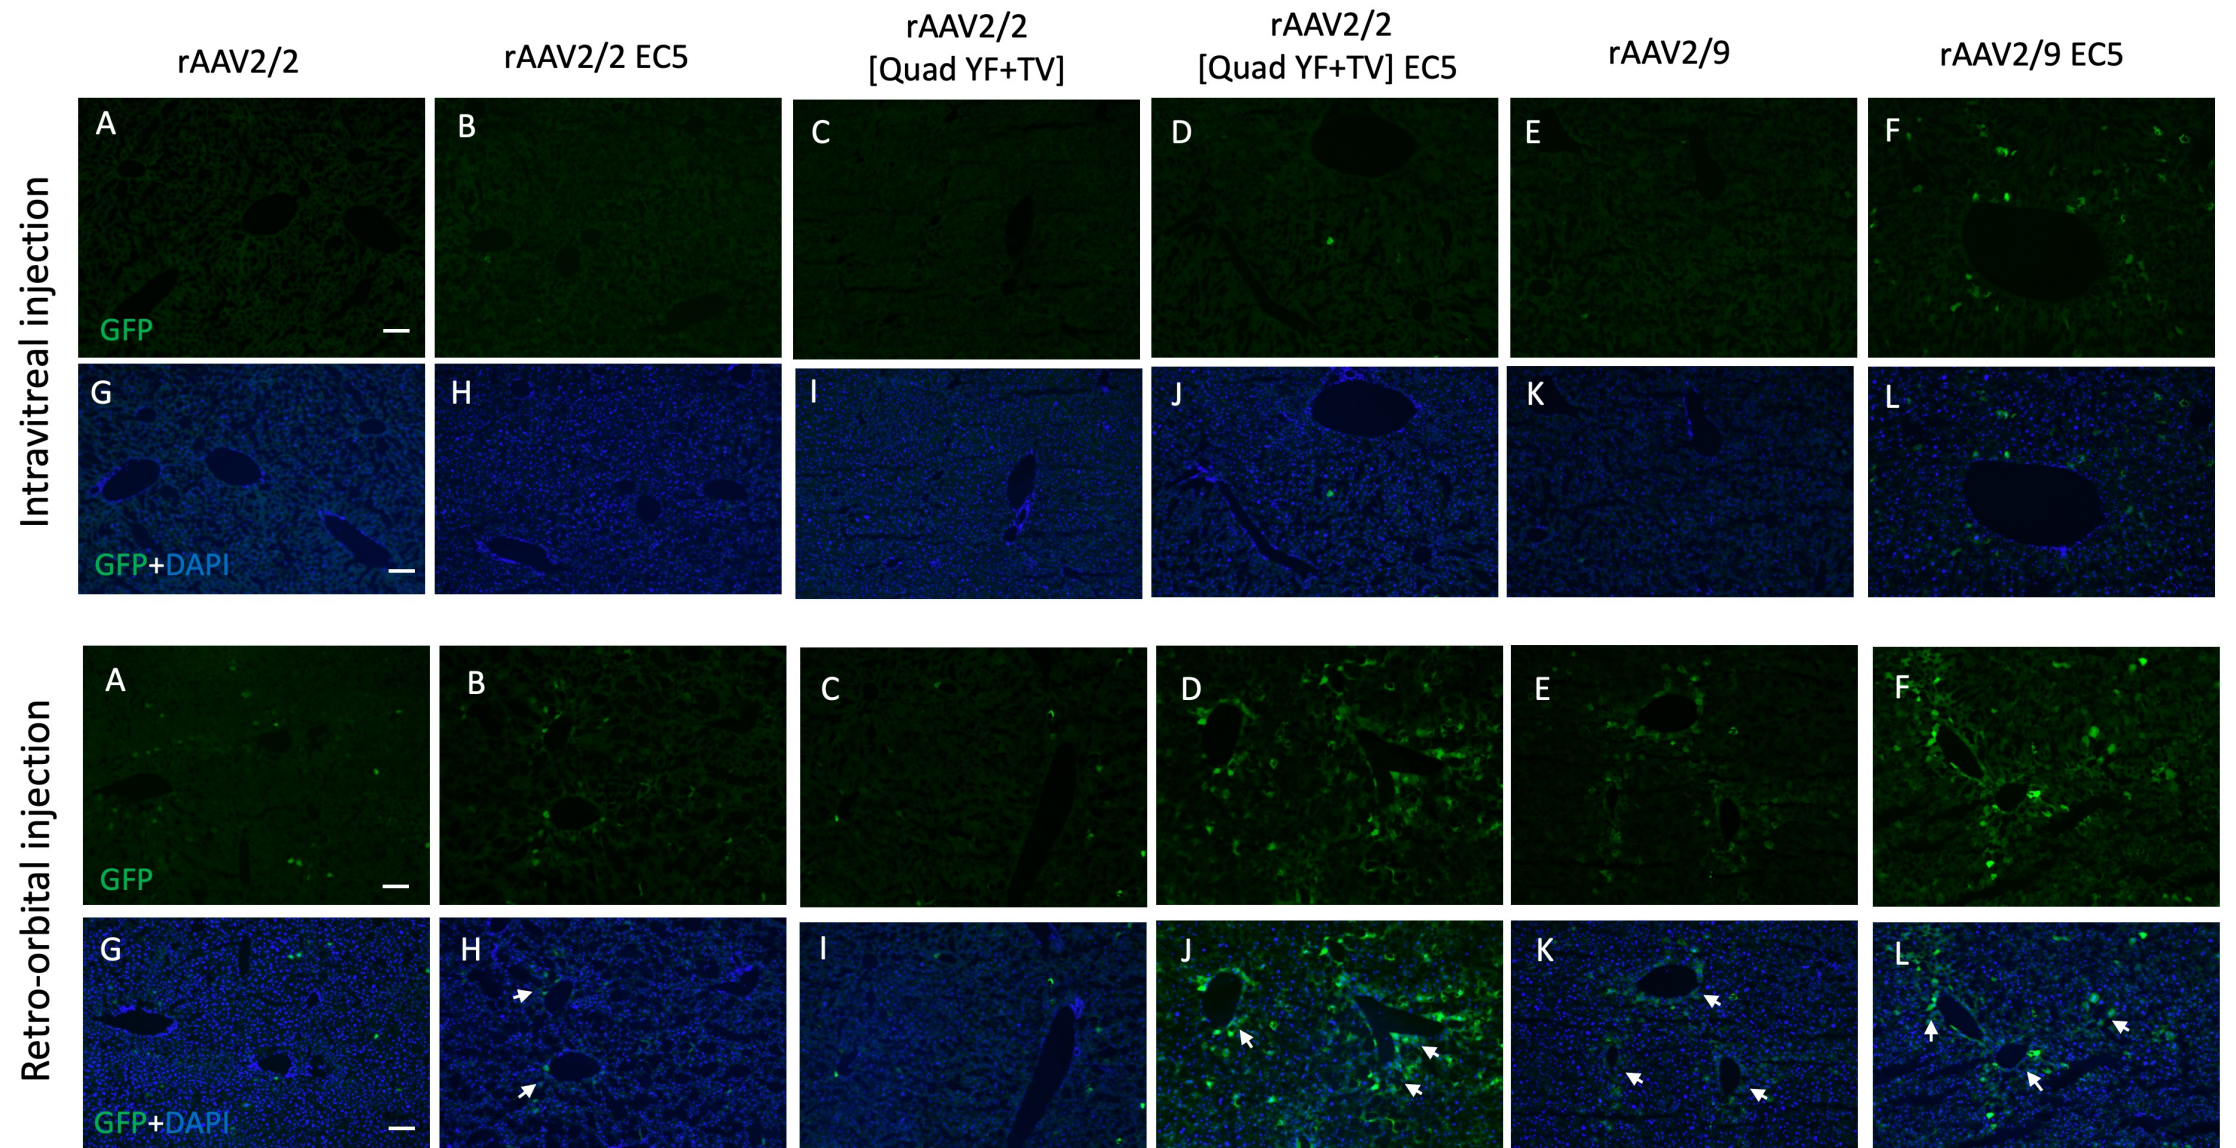



Figure 6

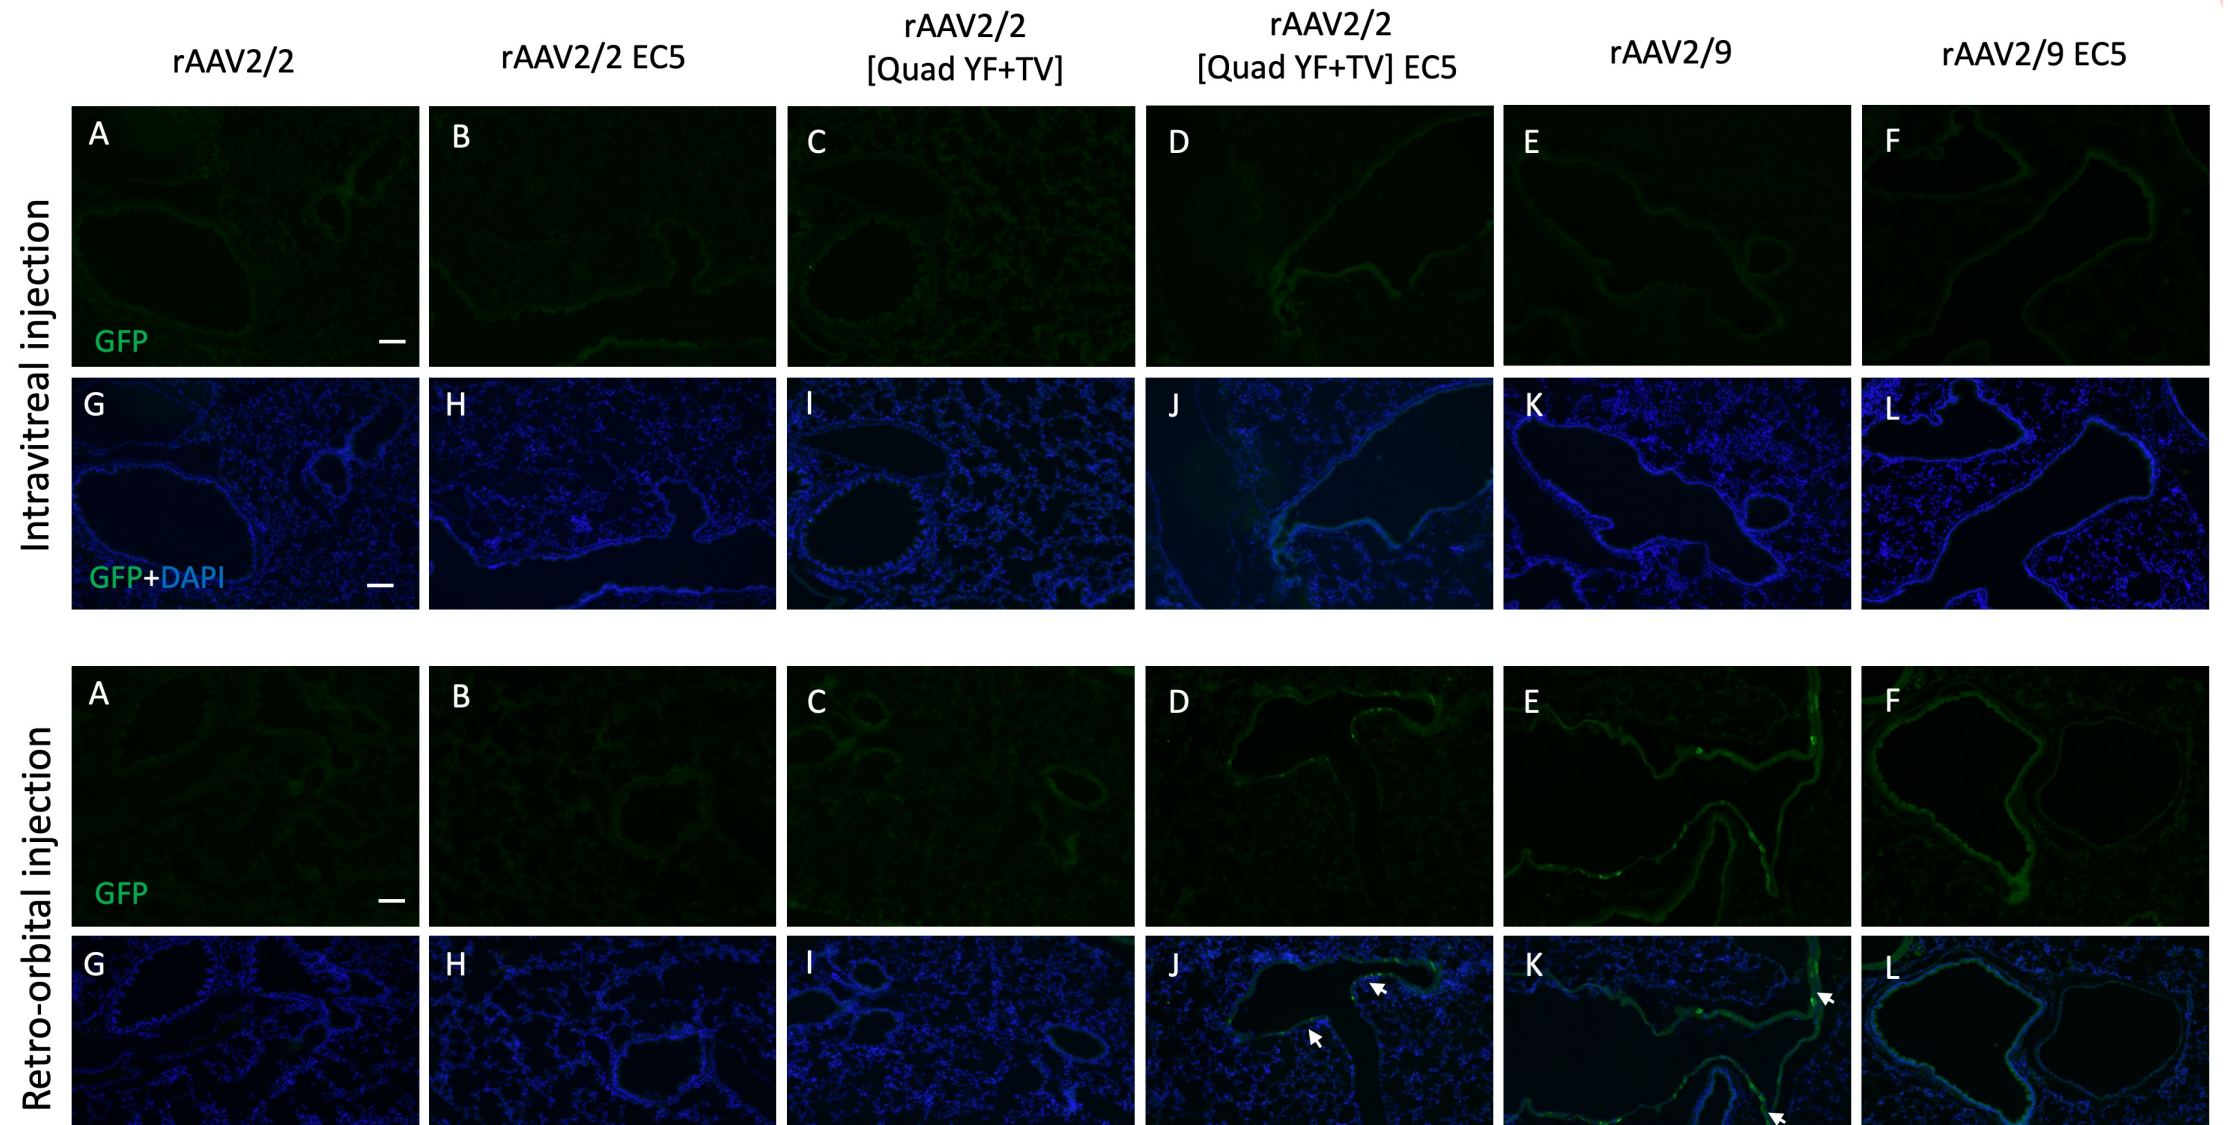



Figure 7

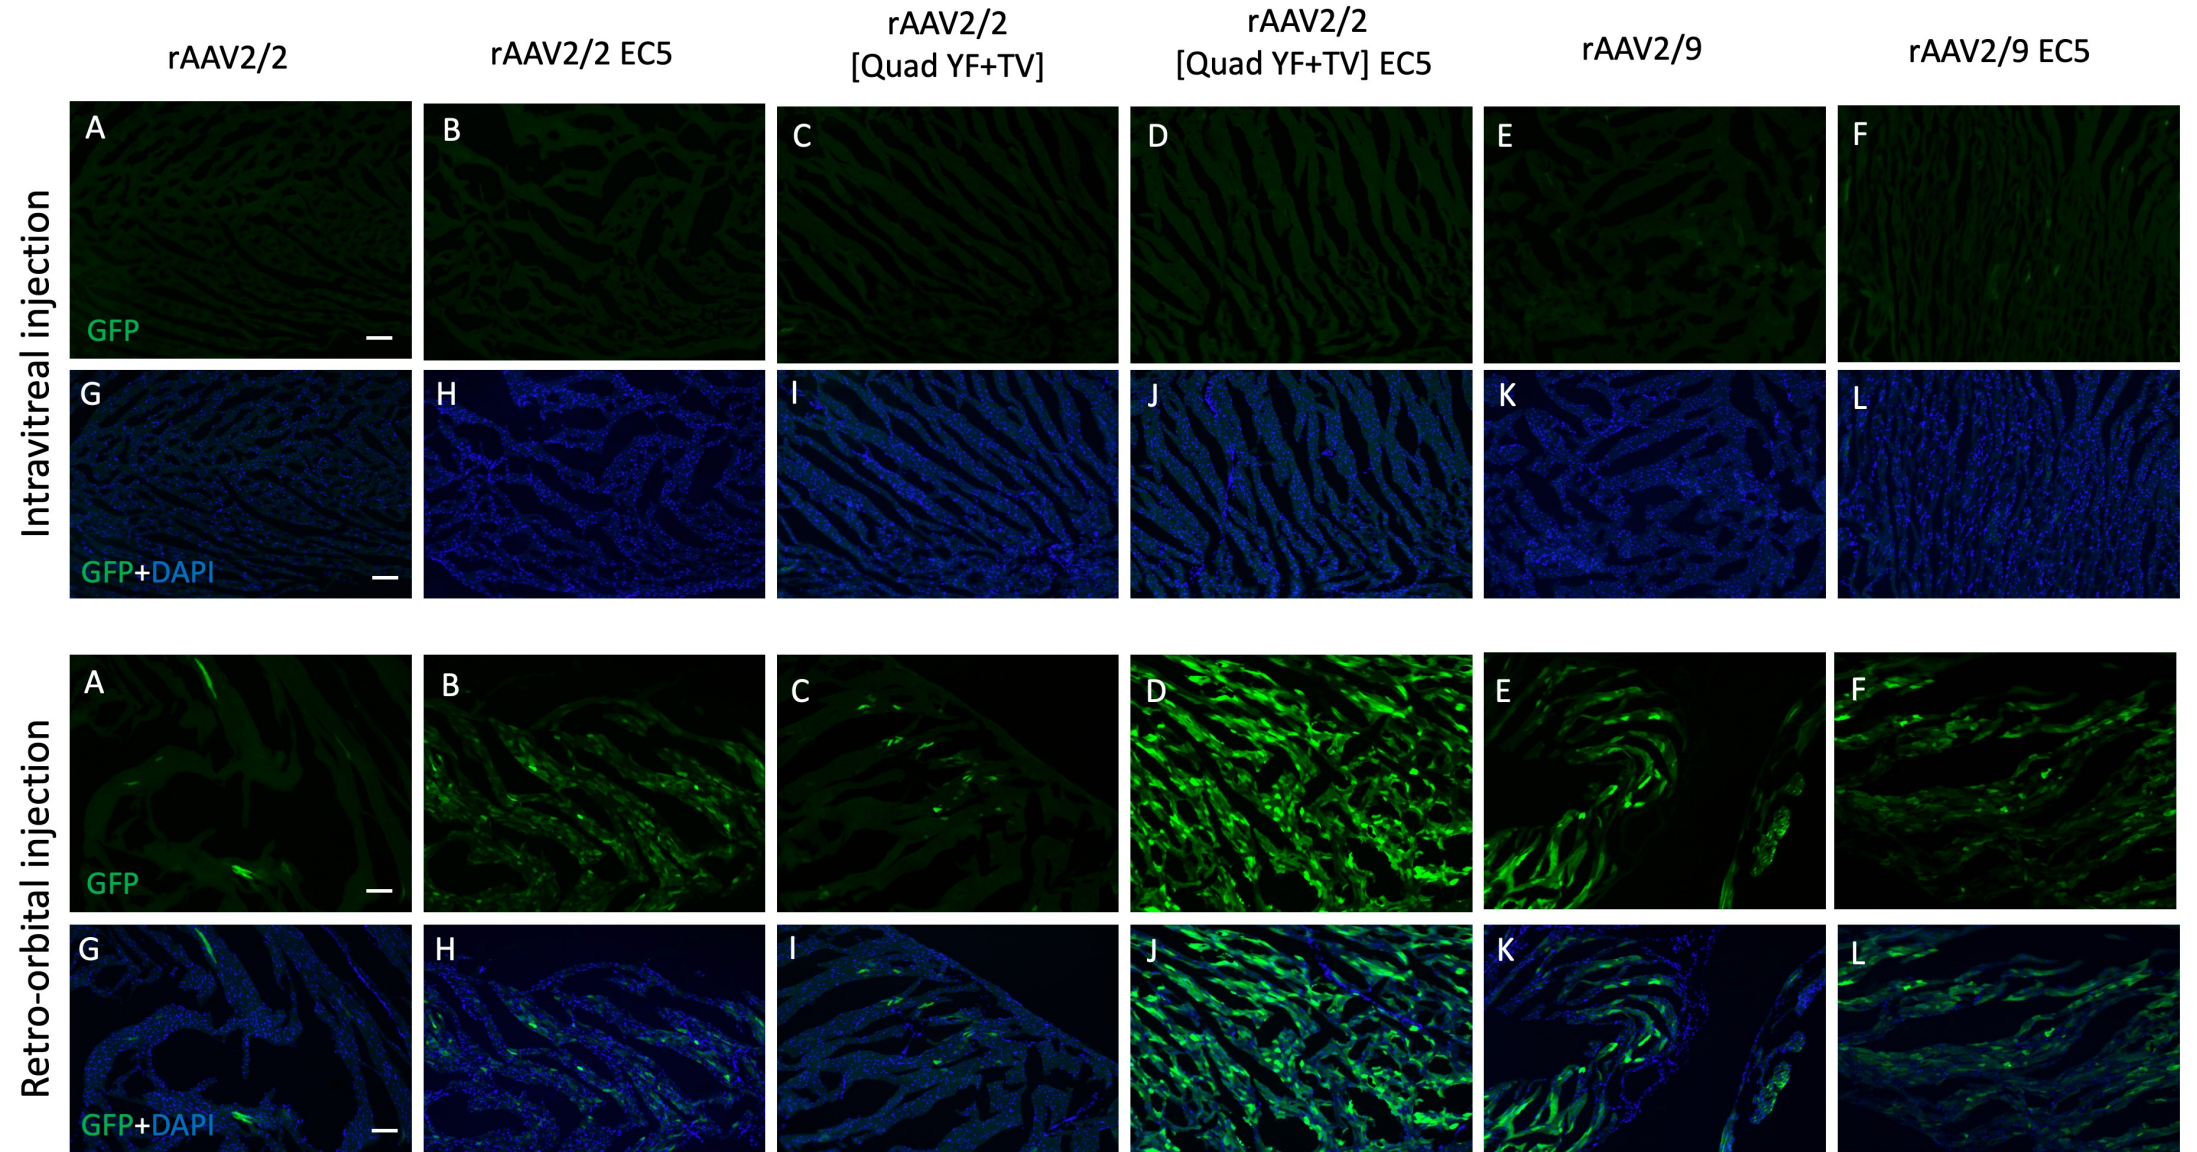



Supplemental 1

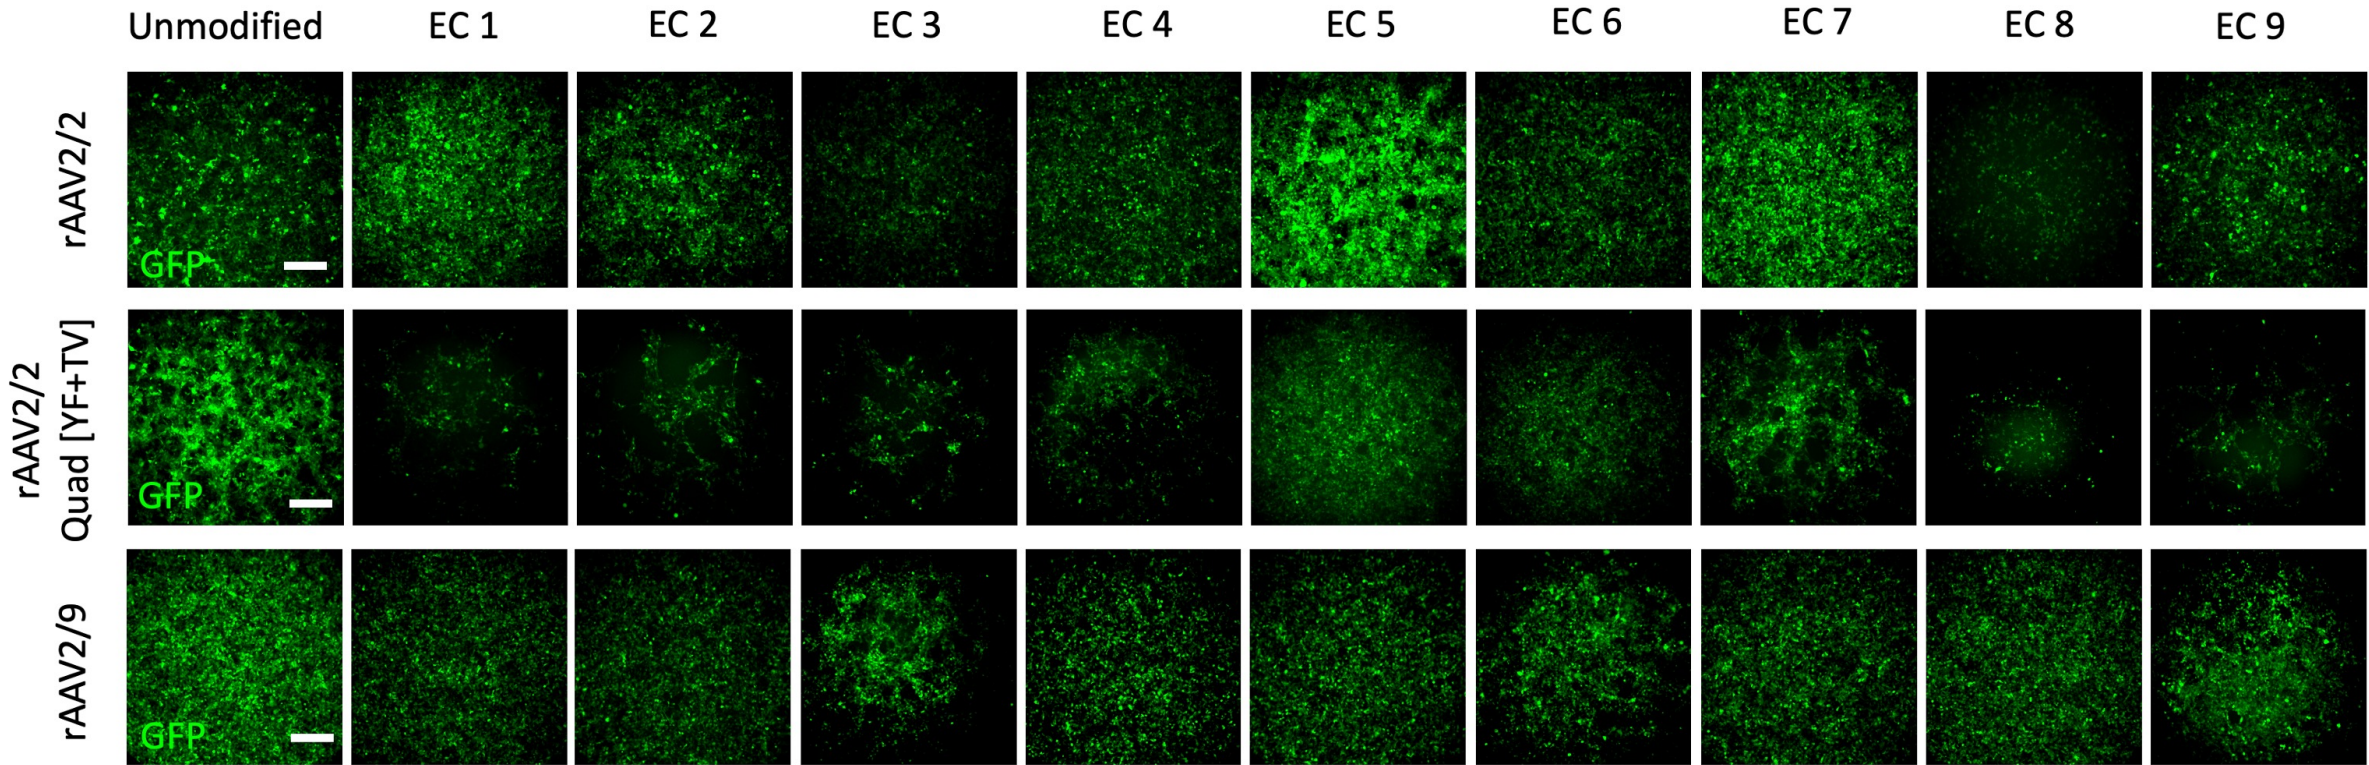

Supplemental 2

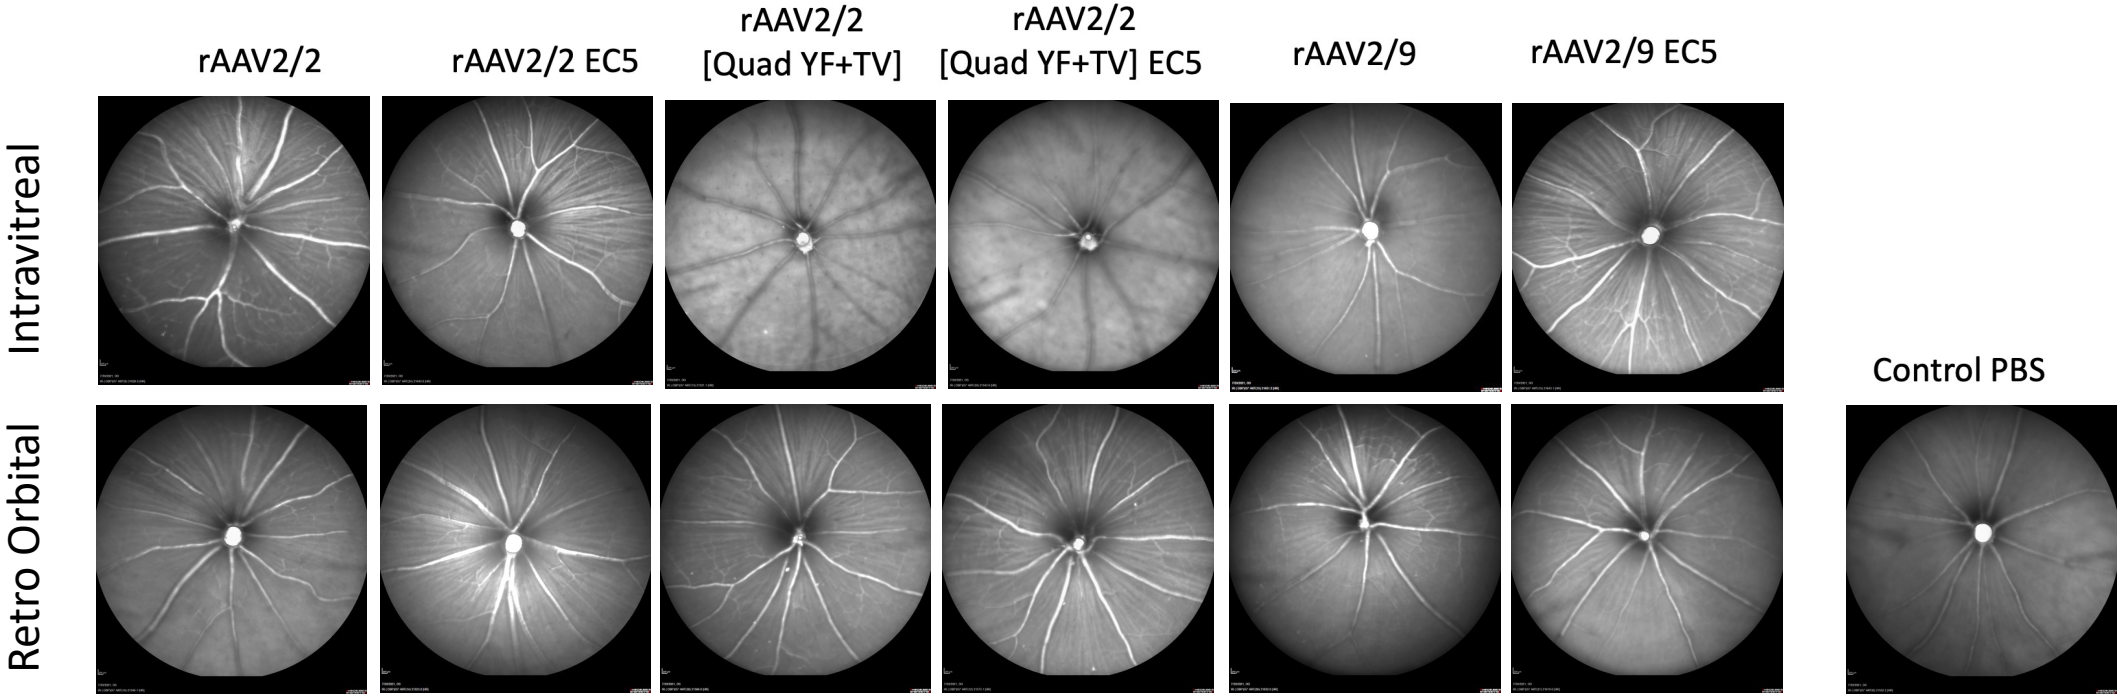



Table 1.

| Heptameric Peptide | Amino Acid Sequence | Relevant Source          | AAV2/2                      |                                |
|--------------------|---------------------|--------------------------|-----------------------------|--------------------------------|
|                    |                     |                          | Forward Primer              | Reverse Primer                 |
| Insert 1           | NRGTEWD             | Korbelin et al. 2016a    | tgagtgggacAGACAAGCAGCTACCGC | gtacctctggtGTTGCCTCTCTGGAGGTTG |
| Insert 2           | ADGVQWT             | Korbelin et al. 2016a    | tcaatggacgAGACAAGCAGCTACCGC | acgccatccgcGTTGCCTCTCTGGAGGTTG |
| Insert 3           | ESGHGYF             | Korbelin et al. 2016b    | cggatacttcAGACAAGCAGCTACCGC | tgcccactttcGTTGCCTCTCTGGAGGTTG |
| Insert 4           | GEARISA             | Michelfelder et al. 2009 | aatctctgcgAGACAAGCAGCTACCGC | cttgcttcgccGTTGCCTCTCTGGAGGTTG |
| Insert 5           | SGNSGAA             | Michelfelder et al. 2009 | cggtgctgcaAGACAAGCAGCTACCGC | gagttgccgctGTTGCCTCTCTGGAGGTTG |
| Insert 6           | ESGLSQS             | Michelfelder et al. 2009 | gagtcaaagcAGACAAGCAGCTACCGC | aagccactttcGTTGCCTCTCTGGAGGTTG |
| Insert 7           | PRSADLA             | Michelfelder et al. 2009 | tgacctcgcaAGACAAGCAGCTACCGC | gcggatctcggGTTGCCTCTCTGGAGGTTG |
| Insert 8           | VSSSTPR             | H. Buning et al. 2019    | gaccccgaggAGACAAGCAGCTACCGC | gagctgctcacGTTGCCTCTCTGGAGGTTG |
| Insert 9           | NNPLPQR             | H. Buning et al. 2019    | cccgcagcggAGACAAGCAGCTACCGC | agcgggtggtGTTGCCTCTCTGGAGGTTG  |

Table 2.

| Heptameric Peptide | Amino Acid Sequence | Relevant Source          | AAV2/2-Quad[YF+TV]          |                                |
|--------------------|---------------------|--------------------------|-----------------------------|--------------------------------|
|                    |                     |                          | Forward Primer              | Reverse Primer                 |
| Insert 1           | NRGTEWD             | Korbelin et al. 2016a    | tgagtgggacAGACAAGCAGCTACCGC | gtacctctgttGTTGCCTCTCTGGAGGTTG |
| Insert 2           | ADGVQWT             | Korbelin et al. 2016a    | tcaatggacgAGACAAGCAGCTACCGC | acgccatccgcGTTGCCTCTCTGGAGGTTG |
| Insert 3           | ESGHGYF             | Korbelin et al. 2016b    | cggatacttcAGACAAGCAGCTACCGC | tgcccacttctGTTGCCTCTCTGGAGGTTG |
| Insert 4           | GEARISA             | Michelfelder et al. 2009 | aatctctgcaAGACAAGCAGCTACCGC | cttgcttgcgcGTTGCCTCTCTGGAGGTTG |
| Insert 5           | SGNSGAA             | Michelfelder et al. 2009 | cggtgctgcaAGACAAGCAGCTACCGC | gagttgccgctGTTGCCTCTCTGGAGGTTG |
| Insert 6           | ESGLSQS             | Michelfelder et al. 2009 | gagtcaaagcAGACAAGCAGCTACCGC | aagccacttctGTTGCCTCTCTGGAGGTTG |
| Insert 7           | PRSADLA             | Michelfelder et al. 2009 | tgacctcgcaAGACAAGCAGCTACCGC | gcggatctcggGTTGCCTCTCTGGAGGTTG |
| Insert 8           | VSSSTPR             | H. Buning et al. 2019    | gaccccgaggAGACAAGCAGCTACCGC | gagctgctcacGTTGCCTCTCTGGAGGTTG |
| Insert 9           | NNPLPQR             | H. Buning et al. 2019    | cccgcagcggAGACAAGCAGCTACCGC | agcgggttgttGTTGCCTCTCTGGAGGTTG |

Table 3.

| Heptameric Peptide | Amino Acid Sequence | Relevant Source          | AAV2/9                       |                                 |
|--------------------|---------------------|--------------------------|------------------------------|---------------------------------|
|                    |                     |                          | Forward Primer               | Reverse Primer                  |
| Insert 1           | NRGTEWD             | Korbelin et al. 2016a    | tgagtgggacCAGGCGCAGACCGGCTGG | gtacctctgttTGCTTGGGCACTCTGGTGG  |
| Insert 2           | ADGVQWT             | Korbelin et al. 2016a    | tcaatggacgCAGGCGCAGACCGGCTGG | acgccatccgctTGCTTGGGCACTCTGGTGG |
| Insert 3           | ESGHGYF             | Korbelin et al. 2016b    | cggatacttcCAGGCGCAGACCGGCTGG | tgccactttcTGCTTGGGCACTCTGGTGG   |
| Insert 4           | GEARISA             | Michelfelder et al. 2009 | aatctctgcgCAGGCGCAGACCGGCTGG | cttgcttcgccTGCTTGGGCACTCTGGTGG  |
| Insert 5           | SGNSGAA             | Michelfelder et al. 2009 | cggtgctgcaCAGGCGCAGACCGGCTGG | gagttgccgctTGCTTGGGCACTCTGGTGG  |
| Insert 6           | ESGLSQS             | Michelfelder et al. 2009 | gagtcaaagcCAGGCGCAGACCGGCTGG | aagccactttcTGCTTGGGCACTCTGGTGG  |
| Insert 7           | PRSADLA             | Michelfelder et al. 2009 | tgacctcgcaCAGGCGCAGACCGGCTGG | gcggatctcggTGCTTGGGCACTCTGGTGG  |
| Insert 8           | VSSSTPR             | H. Buning et al. 2019    | gaccccgaggCAGGCGCAGACCGGCTGG | gagctgctcacTGCTTGGGCACTCTGGTGG  |
| Insert 9           | NNPLPQR             | H. Buning et al. 2019    | cccgcagcggCAGGCGCAGACCGGCTGG | agcgggttgttTGCTTGGGCACTCTGGTGG  |

Table 4.

| <b>Heptameric Insert</b> | <b>Amino Acid Sequence</b> | <b>Net-Charge<br/>At pH 7</b> |
|--------------------------|----------------------------|-------------------------------|
| <b>EC1</b>               | <b>NRGTEWD</b>             | -1                            |
| <b>EC2</b>               | <b>ADGVQWT</b>             | -1                            |
| <b>EC3</b>               | <b>ESGHGYF</b>             | -0.9                          |
| <b>EC4</b>               | <b>GEARISA</b>             | 0                             |
| <b>EC5</b>               | <b>SGNSGAA</b>             | 0                             |
| <b>EC6</b>               | <b>ESGLSQS</b>             | -1                            |
| <b>EC7</b>               | <b>PRSadLA</b>             | 0                             |
| <b>EC8</b>               | <b>VSSSTPR</b>             | 1                             |
| <b>EC9</b>               | <b>NNPLPQR</b>             | 1                             |

## Figure and Table legends

**Figure 1. Optimizing MOI and Validating Infectivity.** (A) HEK293T cells were seeded in 24-well plates (~500,000 cells/well), and transduced with rAAV2/2.CBA-scGFP at 10,000 MOI (N=3 wells) and 50,000 MOI (N=3). Percent transduction was quantified by flow cytometry as the percentage of GFP+ cells. A paired t-test revealed that the difference in percent transduction between 10,000 MOI and 50,000 MOI was not significant (n.s.) (B). Primary BMVECs were seeded in 24-well plates (~100,000 cells/well), and cells were transduced with rAAV2/2.CBA-scGFP at 10,000, 30,000, 50,000, and 100,000 MOI (N=3 wells per MOI). One-way ANOVA with post-hoc Tukey test revealed significant dose-dependent differences in the percent transduction of BMVECs (\*p<0.05, \*\*p<0.01). Based on the findings in Panel A, the infectivity of rAAV2/2, rAAV2/2[QuadYF+TV], rAAV2/9, and respective mutant vectors packaging a ubiquitously expressing GFP reporter cassette were assessed upon transducing HEK293T cells at 10,000 MOI

**Figure 2. In Vitro Screening of rAAV2/2, rAAV2/2[QuadYF+TV] and rAAV2/9-based EC Mutants.** Based on the findings in Figure 1B, primary BMVECs were infected in triplicates with the vectors at 75,000 MOI. Scale bar: 100µm.

**Figure 3. Transduction efficiency by Flowcytometry.** (A) Representative Flow Cytometry Gating for BMVEC stained with CD31 Antibody. Flow cytometry was performed following rAAV transduction. BMVEC were analyzed after debris exclusion (A) and single-cell selection (B). Untransduced BMVEC cells were used as the gating control (C), Q1 = GFP+ve cells only, Q2= GFP+ve and CD31+ve cells, Q3=CD31+ve cells only, and Q4=GFP-ve and CD31-ve cells (D). (E) Transduction efficiency was quantified as the total percentage of GFP+CD31+ cells normalized to the percentage of CD31+ cells in each well. The transduction efficiency of each mutant EC-targeting vector was compared to unmodified rAAV2/2, rAAV2/2[QuadYF+TV], and rAAV2/9 as fold-change (n=3).

**Figure 4. In vivo assessment of rAAV-mediated GFP Expression in mice retina.**

C57BL/6 mice received 2ul of mutant vectors containing EC5 and the unmodified vector as control through bilateral intravitreal injections (A-F) and unilateral retro-orbital injections (G-L), and PBS control (M). GFP expression were imaged four months post-injection using a multi-line cSLO. Note the GFP expression (top row) with the indicated insets magnified (bottom row) Red arrows indicate retinal vessel (vascular) transduction, Yellow arrows

indicate the transduction of cells closer to the optic discs, and Blue arrows indicate GFP expression from the cells closer to the major retinal blood vessels. Scale bar: 800 $\mu$ m.

**Figure 5. rAAV-mediated transduction in murine liver by Intravitreal and Retro-orbital delivery.**

C57BL/6 mice received 2 $\mu$ l of mutant vectors containing EC5 and the unmodified vector as control through bilateral intravitreal injections (Top Panel) and unilateral retro-orbital injections (Bottom Panel). After four months post-injection, Immunofluorescence of cryosectioned liver sections was imaged for GFP signal (A-F) with counterstaining of DAPI (G-L). Note: White arrows indicate cells having high GFP expression surrounding the hepatic and bile ducts.

**Figure 6. rAAV-mediated transduction in murine lung by Intravitreal and Retro-orbital delivery.**

C57BL/6 mice received 2 $\mu$ l of mutant vectors containing EC5 and the unmodified vector as control through bilateral intravitreal injections (Top Panel) and unilateral retro-orbital injections (Bottom Panel). After four months post-injection, Immunofluorescence of cryosectioned lung sections was imaged for GFP signal (A-F) with counterstaining of DAPI (G-L). Note: White arrows indicate cells having GFP expression surrounding the blood vessels.

**Figure 7. rAAV-mediated transduction in murine heart by Intravitreal and Retro-orbital delivery.**

C57BL/6 mice received 2 $\mu$ l of mutant vectors containing EC5 and the unmodified vector as control through bilateral intravitreal injections (Top Panel) and unilateral retro-orbital injections (Bottom Panel). After four months post-injection, Immunofluorescence of cryosectioned heart sections was imaged for GFP signal (A-F) with counterstaining of DAPI (G-L).

**Supplemental Figure 1. Screening of transduction efficiency in BMVEC**

All vectors at 75,000 MOI were introduced to BMVEC and observed under a Fluorescence microscope for GFP expression after 72 hours. All the control vectors could transduce the BMVEC (GFP positive); however, GFP expression varied among the mutant vectors. Scale bar: 150 $\mu$ m.

**Supplemental Figure 2. In vivo assessment of rAAV injections in mice retina.**

Near-infrared (820nm) reflectance imaging was performed using Confocal scanning laser ophthalmoscopy (cSLO) four months post-injection, and No evidence of ocular damage was observed. The above figure represents the cSLO images of mice eyes that received Intravitreal and Retro Orbital injections (2ul each) of all vectors and control (PBS).

**Table 1. Primer Design for Site-Directed Mutagenesis of AAV2/2-based rep-cap Plasmids**

**Table 2. Primer Design for Site-Directed Mutagenesis of AAV2/2[QuadYF+TV]-based rep-cap Plasmids**

**Table 3. Primer Design for Site-Directed Mutagenesis of AAV2/9-based rep-cap Plasmids**

**Table 4. Net-Charge of EC-Targeting Heptameric Peptides.**
